# Supplementary material for: Diet and hygiene practices influence morbidity in schoolchildren living in Schistosomiasis endemic areas along Lake Victoria in Kenya and Tanzania—A cross-sectional study
Source: PLoS Negl Trop Dis. 2018 Mar 28;12(3):e0006373. doi: 10.1371/journal.pntd.0006373 (PMC5891076; doi:10.1371/journal.pntd.0006373)
Supplement: S1 Data — (XLSX) [file pntd.0006373.s003.xlsx]

## Sheet: Data_R
Child_ID	Country	village	school	sex	age	agegr	grade	sch_epg	sch_prev	intgroup	studyarm	shuttle	VO2	hb	Anaemia	hbadjust	Anaeadjust	height	heightgr	weight	Wasting	malaria	Transportation	Distance	ToiletVisit	Teachers	Shoes	Breakfast	BMeat	BMeatType	BGrain	BVegetables	BInadequate	BLocation	Lunch	LMeat	LMeatType	LGrain	LVegetable	LInadequate	LLocation	Dinner	DMeat	DMeatType	DGrain	DVegetables	DInadequate	Meat	Meatgr
PKC0007	0	NYAMONYE	NYAMONYE	0	9	0	.	0	0	0	6	1	41.1	130	0	128	0	133	0	29.8	0	1	0	0	1	0	1	1	0	0	1	0	0	0	1	1	2	1	0	0	0	1	1	2	1	0	0	2	1
PKC0010	0	NYAMONYE	NYAMONYE	0	10	1	.	4	1	1	6	3	43.9	110	1	108	1	141	1	28	0	1	0	1	1	1	0	0	.	.	.	.	.	.	1	1	2	1	0	0	0	1	0	0	1	1	0	1	1
PKC0021	0	NYAMONYE	NYAMONYE	0	9	0	.	12	1	1	6	2	43.4	110	1	108	1	134	0	26.8	0	0	0	0	1	1	0	0	.	.	.	.	.	.	1	0	0	1	1	0	0	1	0	0	1	1	0	0	0
PKC0024	0	WIMIHA	UYAWI	1	10	1	.	0	0	0	1	.	.	90	1	88	1	137.9	1	28	0	0	0	0	0	1	0	0	.	.	.	.	.	.	1	1	2	1	0	0	0	1	0	0	1	1	0	1	1
PKC0025	0	WIMIHA	UYAWI	0	10	1	.	0	0	0	1	.	.	100	1	98	1	138.5	1	20.1	0	0	0	0	0	1	1	1	0	0	1	0	0	0	1	1	2	1	0	0	0	1	1	2	1	0	0	2	1
PKC0026	0	NYAMONYE	NYAMONYE	1	10	1	.	0	0	0	6	.	.	100	1	98	1	133.5	0	28.1	0	0	0	1	1	1	1	1	0	0	1	0	0	0	1	1	2	1	0	0	0	1	1	2	1	0	0	2	1
PKC0028	0	NYAMONYE	NYAMONYE	1	9	0	.	18	1	1	6	2	43.4	80	1	78	1	130	0	26.9	0	0	0	1	1	1	1	1	0	0	1	0	0	0	1	1	2	1	0	0	0	1	0	0	1	0	0	1	1
PKC0030	0	NYAMONYE	NYAMONYE	1	9	0	.	0	0	0	6	3	45.7	100	1	98	1	129	0	25	0	1	0	1	1	1	1	1	0	0	1	0	0	0	1	0	0	1	0	0	0	1	0	0	1	1	0	0	0
PKC0033	0	NYAMONYE	NYAMONYE	1	9	0	.	0	0	0	6	5	50.3	110	1	108	1	137	1	28.4	0	0	0	0	1	1	1	1	0	0	1	0	0	0	1	0	0	1	0	0	0	1	0	0	1	1	0	0	0
PKC0034	0	NYAMONYE	NYAMONYE	1	10	1	.	264	1	2	6	4	46.3	140	0	138	0	136	1	32.9	0	0	0	1	1	1	1	1	0	0	1	0	0	0	1	0	0	1	1	0	0	1	0	0	1	1	0	0	0
PKC0039	0	NYAMONYE	NYAMONYE	0	10	1	.	12	1	1	6	4	46.3	130	0	128	0	126.7	0	26.7	0	0	0	1	1	1	1	1	0	0	1	0	0	0	1	1	2	1	0	0	0	1	1	2	1	0	0	2	1
PKC0044	0	NYAMONYE	NYAMONYE	1	10	1	.	90	1	1	6	3	43.9	140	0	138	0	141.5	1	28.3	0	1	0	1	1	1	1	0	.	.	.	.	.	.	1	0	0	1	0	1	0	1	1	2	1	0	0	1	1
PKC0059	0	NYAMONYE	NYAMONYE	0	10	1	.	0	0	0	6	3	43.9	120	0	118	0	133.5	0	32.1	0	0	0	1	1	1	1	1	0	0	1	0	0	0	1	1	2	1	0	0	0	1	0	0	1	0	0	1	1
PKC0078	0	NYAMONYE	NYAMONYE	1	9	0	.	0	0	0	6	4	48	120	0	118	0	125	0	27.7	0	1	0	1	1	1	1	1	0	0	1	0	0	0	1	1	2	1	0	0	0	1	1	2	1	0	0	2	1
PKC0082	0	NYAMONYE	NYAMONYE	0	9	0	.	12	1	1	6	3	45.7	130	0	128	0	118.5	0	21.2	0	0	0	0	1	1	1	1	0	0	1	1	0	0	1	1	2	1	0	1	0	1	0	0	1	1	0	1	1
PKC0086	0	NYAMONYE	NYAMONYE	0	9	0	.	4	1	1	6	3	45.7	80	1	78	1	137.5	1	32.9	0	0	0	1	1	1	1	0	.	.	.	.	.	.	1	0	.	1	0	0	0	1	0	0	1	1	0	0	0
PKC0087	0	NYAMONYE	NYAMONYE	1	10	1	.	0	0	0	6	3	43.9	110	1	108	1	134	0	29.7	0	0	0	1	1	1	1	1	0	0	1	0	0	0	1	1	2	1	0	0	0	1	1	2	1	0	0	2	1
PKC0089	0	NYAMONYE	NYAMONYE	1	9	0	.	0	0	0	6	5	50.3	150	0	148	0	126.9	0	24	0	0	0	1	1	1	1	1	0	0	1	0	0	0	1	0	0	1	0	0	0	1	0	0	1	1	0	0	0
PKC0091	0	NYAMONYE	NYAMONYE	0	10	1	.	84	1	1	6	2	41.5	110	1	108	1	124.8	0	25.8	0	1	0	1	0	1	0	1	0	0	1	0	0	0	1	0	0	1	0	0	0	1	0	0	1	1	0	0	0
PKC0092	0	NYAMONYE	NYAMONYE	0	10	1	.	0	0	0	6	3	43.9	80	1	78	1	134.5	0	30.4	0	0	0	0	1	1	1	0	.	.	.	.	.	.	1	0	0	1	0	0	0	1	0	0	1	1	0	0	0
PKC0096	0	NYAMONYE	NYAMONYE	0	9	0	.	72	1	1	6	2	43.4	130	0	128	0	143	1	32.9	0	0	0	1	1	1	1	0	.	.	.	.	.	.	1	1	4	1	0	0	0	1	1	2	1	0	0	2	1
PKC0109	0	ORENGO	ORENGO	1	10	1	.	112	1	2	1	2	41.5	130	0	128	0	130	0	21	1	1	1	0	1	1	1	1	0	0	1	0	0	1	1	0	0	1	1	0	0	1	0	0	1	1	0	0	0
PKC0115	0	ORENGO	ORENGO	1	9	0	.	12	1	1	1	4	48	130	0	128	0	131	0	25	0	0	0	0	1	1	0	0	.	.	.	.	.	.	1	1	2	1	0	0	0	1	0	0	1	1	0	1	1
PKC0117	0	ORENGO	ORENGO	1	9	0	.	412	1	3	1	4	48	100	1	98	1	126.2	0	20	1	0	0	1	1	1	1	0	0	0	1	0	0	0	1	1	2	1	0	0	0	1	0	0	1	0	0	1	1
PKC0122	0	ORENGO	ORENGO	0	9	0	.	120	1	2	1	6	52.6	120	0	118	0	128.9	0	22	1	1	0	1	1	1	1	0	.	.	.	.	.	.	1	1	2	1	0	0	0	1	0	0	1	1	0	1	1
PKC0125	0	ORENGO	ORENGO	0	9	0	.	40	1	1	1	2	43.4	90	1	88	1	125	0	22	0	1	0	1	1	1	1	1	0	0	1	0	0	0	1	1	2	1	0	0	0	1	0	0	1	1	0	1	1
PKC0131	0	ORENGO	ORENGO	1	9	0	.	128	1	2	1	2	43.4	80	1	78	1	121	0	19	1	1	0	1	1	1	1	1	0	0	1	0	0	0	1	0	0	1	0	0	0	1	1	2	1	0	0	1	1
PKC0140	0	ORENGO	ORENGO	1	9	0	.	76	1	1	1	4	48	120	0	118	0	121.3	0	22	0	0	0	0	1	1	1	1	0	0	1	0	0	0	1	0	0	1	1	0	0	1	1	2	1	0	0	1	1
PKC0150	0	ORENGO	ORENGO	0	10	1	.	160	1	1	1	4	46.3	130	0	128	0	132	0	24	0	1	0	1	1	1	1	0	.	.	.	.	.	.	1	0	0	1	0	0	0	1	1	2	1	0	0	1	1
PKC0152	0	ORENGO	ORENGO	1	10	1	.	280	1	2	1	3	43.9	130	0	128	0	135.3	1	30	0	0	0	0	1	1	1	0	.	.	.	.	.	.	1	0	0	1	0	0	0	1	0	0	1	1	0	0	0
PKC0164	0	ORENGO	ORENGO	0	10	1	.	84	1	1	1	1	39.1	90	1	88	1	130.7	0	24	0	0	0	1	1	1	1	0	.	.	.	.	.	.	1	0	0	1	1	0	0	1	0	0	1	0	0	0	0
PKC0175	0	ORENGO	ORENGO	0	9	0	.	216	1	2	1	1	41.1	90	1	88	1	132	0	28	0	0	0	0	1	1	1	0	.	.	.	.	.	.	1	0	0	1	0	0	0	1	0	0	1	0	0	0	0
PKC0181	0	ORENGO	ORENGO	0	10	1	.	76	1	1	1	2	41.5	50	1	48	1	134	0	27	0	0	0	0	1	1	0	1	0	0	0	0	1	0	1	0	0	1	1	0	0	1	0	0	1	0	1	0	0
PKC0186	0	ORENGO	ORENGO	1	10	1	.	392	1	2	1	4	46.3	90	1	88	1	127.1	0	25	0	0	0	1	1	1	0	1	0	0	1	0	0	0	1	0	0	1	1	0	0	1	0	0	1	0	0	0	0
PKC0190	0	ORENGO	ORENGO	1	9	0	.	208	1	2	1	6	52.6	100	1	98	1	124.8	0	25	0	1	0	1	1	1	0	0	.	.	.	.	.	.	1	1	2	1	0	0	0	1	0	0	1	0	0	1	1
PKC0193	0	ORENGO	ORENGO	0	10	1	.	68	1	1	1	2	41.5	130	0	128	0	130.9	0	27	0	0	0	1	1	1	1	1	0	0	1	0	0	0	1	1	2	1	0	0	0	1	0	0	1	0	0	1	1
PKC0197	0	ORENGO	ORENGO	0	10	1	.	0	0	0	1	2	41.5	80	1	78	1	132.7	0	29	0	0	0	1	1	1	0	1	0	0	1	0	0	0	1	1	2	1	0	0	0	1	1	1	1	0	0	2	1
PKC0199	0	ORENGO	ORENGO	1	10	1	.	100	1	2	1	5	48.7	110	1	108	1	133.2	0	29	0	1	0	1	1	1	0	0	.	.	.	.	.	.	1	1	2	1	0	0	0	1	0	0	1	1	0	1	1
PKC0319	0	OTUOMA	OTUOMA	1	9	0	.	24	1	1	6	4	48	130	0	128	0	142	1	32.5	0	1	0	1	0	1	1	0	.	.	.	.	.	.	1	0	0	1	0	0	0	1	0	0	1	1	0	0	0
PKC0326	0	OTUOMA	OTUOMA	1	9	0	.	108	1	2	6	3	45.7	110	1	108	1	123.5	0	22	0	0	0	0	0	1	0	0	.	.	.	.	.	.	1	0	0	1	1	0	0	1	1	2	0	0	0	1	1
PKC0327	0	OTUOMA	OTUOMA	0	9	0	.	148	1	2	6	3	45.7	110	1	108	1	132.1	0	26	0	0	0	1	0	1	1	0	.	.	.	.	.	.	1	1	2	1	0	0	0	1	1	1	1	1	0	2	1
PKC0331	0	OTUOMA	OTUOMA	0	9	0	.	12	1	1	6	3	45.7	100	1	98	1	127	0	24	0	0	0	1	0	1	1	0	.	.	.	.	.	.	1	0	0	1	0	0	0	1	1	2	1	0	0	1	1
PKC0332	0	OTUOMA	OTUOMA	1	9	0	.	40	1	1	6	4	48	90	1	88	1	130	0	27	0	0	0	1	0	1	1	1	0	0	1	0	0	0	1	1	2	1	0	0	0	1	0	0	1	1	0	1	1
PKC0341	0	OTUOMA	OTUOMA	0	10	1	.	448	1	3	6	4	46.3	100	1	98	1	139.5	1	33	0	1	0	0	0	0	1	1	0	0	1	0	0	0	1	0	0	1	1	0	0	1	0	0	1	1	0	0	0
PKC0346	0	OTUOMA	OTUOMA	0	10	1	.	20	1	1	6	3	43.9	80	1	78	1	130.1	0	30	0	0	0	1	0	1	1	1	0	0	1	0	0	0	1	0	0	1	0	0	0	1	1	4	1	1	0	1	1
PKC0350	0	OTUOMA	OTUOMA	0	10	1	.	64	1	1	6	2	41.5	140	0	138	0	137.6	1	29	0	0	0	1	0	0	1	0	.	.	.	.	.	.	1	0	0	1	0	0	0	1	1	2	1	0	0	1	1
PKC0354	0	OTUOMA	OTUOMA	0	10	1	.	16	1	1	6	3	43.9	110	1	108	1	125.6	0	23	0	0	0	0	0	1	1	1	0	0	0	0	1	0	1	1	2	1	0	0	0	1	1	2	1	0	0	2	1
PKC0363	0	OTUOMA	OTUOMA	0	10	1	.	414	1	3	6	2	41.5	140	0	138	0	129.9	0	23.1	1	1	0	1	0	0	1	1	0	0	1	0	0	1	1	0	0	0	1	0	0	1	0	0	1	1	0	0	0
PKC0372	0	OTUOMA	OTUOMA	0	10	1	.	150	1	2	6	4	46.3	140	0	138	0	139.5	1	28.8	0	0	0	1	0	1	1	1	0	0	1	0	0	0	1	1	2	1	0	0	0	1	0	0	1	1	0	1	1
PKC0375	0	OTUOMA	OTUOMA	0	11	1	.	84	1	1	6	7	52	140	0	138	0	140.3	1	35	0	0	0	0	0	1	1	1	0	0	1	0	0	0	1	0	0	1	1	0	0	1	1	4	1	1	0	1	1
PKC0376	0	OTUOMA	OTUOMA	1	9	0	.	4	1	1	6	4	48	90	1	88	1	135	1	29	0	0	0	1	1	1	1	0	.	.	.	.	.	.	1	0	0	0	1	0	0	1	1	2	1	0	0	1	1
PKC0381	0	OTUOMA	OTUOMA	1	11	1	.	356	1	2	6	8	54.4	90	1	88	1	142	1	38	0	0	0	0	0	0	0	1	0	0	1	0	0	0	1	0	0	1	0	0	0	1	1	2	1	1	0	1	1
PKC0382	0	OTUOMA	OTUOMA	1	11	1	.	144	1	2	6	1	37.2	90	1	88	1	123.8	0	22.9	0	0	0	0	0	0	1	0	.	.	.	.	.	.	1	0	0	1	0	0	0	1	1	1	1	0	0	1	1
PKC0388	0	OTUOMA	OTUOMA	1	11	1	.	42	1	1	6	3	42.1	120	0	118	0	138.3	1	28	0	0	0	1	0	1	1	1	0	0	1	0	0	0	1	0	0	1	0	0	0	1	0	0	1	1	0	0	0
PKC0393	0	OTUOMA	OTUOMA	0	11	1	.	204	1	2	6	3	42.1	80	1	78	1	121	0	22	0	1	0	1	0	0	1	1	0	0	0	1	0	0	1	0	0	0	1	0	0	1	0	0	1	1	0	0	0
PKC0396	0	OTUOMA	OTUOMA	1	11	1	.	144	1	2	6	7	52	120	0	118	0	130.5	0	29	0	0	0	1	0	1	1	0	.	.	.	.	.	.	1	0	0	0	1	0	0	1	1	2	1	0	0	1	1
PKC0456	0	NYAGUDA	NYAGUDA	0	10	1	.	116	1	2	6	2	41.5	80	1	78	1	130.5	0	27.4	0	0	0	0	0	1	1	0	.	.	.	.	.	.	1	0	0	1	0	0	0	1	1	1	1	0	0	1	1
PKC0458	0	NYAGUDA	NYAGUDA	1	10	1	.	0	0	0	6	5	48.7	100	1	98	1	131.5	0	27.1	0	0	0	0	1	1	1	1	0	0	1	0	0	0	1	0	0	1	1	0	0	1	1	2	0	0	0	1	1
PKC0460	0	NYAGUDA	NYAGUDA	0	10	1	.	32	1	1	6	4	46.3	110	1	108	1	123.8	0	25.7	0	1	0	0	0	1	1	1	0	0	1	0	0	0	1	0	0	1	1	0	0	1	0	0	1	1	0	0	0
PKC0464	0	NYAGUDA	NYAGUDA	0	10	1	.	8	1	1	6	4	46.3	100	1	98	1	137.4	1	29.8	0	0	0	0	0	1	1	1	0	0	1	1	0	0	1	1	2	1	0	0	0	1	0	0	1	1	0	1	1
PKC0465	0	NYAGUDA	NYAGUDA	1	9	0	.	.	.	.	6	.	.	.	.	.	.	127.3	0	21.4	1	0	0	1	0	1	1	1	0	0	1	0	0	0	1	0	0	1	1	0	0	1	0	0	1	0	0	0	0
PKC0466	0	NYAGUDA	NYAGUDA	0	10	1	.	92	1	1	6	4	46.3	110	1	108	1	127.5	0	25.7	0	0	0	0	0	0	0	0	.	.	.	.	.	.	1	0	0	1	0	0	0	1	0	0	1	1	0	0	0
PKC0468	0	NYAGUDA	NYAGUDA	0	10	1	.	0	0	0	6	5	48.7	80	1	78	1	134.8	0	28.3	0	0	0	1	0	1	1	1	0	0	1	0	0	0	1	1	2	1	0	0	0	1	0	0	1	1	0	1	1
PKC0473	0	WIMIHA	UYAWI	0	10	1	.	4	1	1	1	.	.	100	1	98	1	129.2	0	27	0	0	0	0	0	1	1	1	0	0	1	1	0	0	1	1	2	1	0	0	0	1	1	2	1	0	0	2	1
PKC0475	0	WIMIHA	UYAWI	0	10	1	.	0	0	0	1	2	41.5	120	0	118	0	131.5	0	25.4	0	0	0	0	0	1	1	1	0	0	1	0	0	0	1	0	0	1	0	0	0	1	1	2	1	0	0	1	1
PKC0479	0	WIMIHA	UYAWI	0	10	1	.	24	1	1	1	2	41.5	110	1	108	1	130.6	0	26	0	0	0	1	0	1	1	1	0	0	1	0	0	0	1	0	0	1	1	0	0	1	0	0	1	1	0	0	0
PKC0590	0	WIMIHA	UYAWI	1	9	0	.	0	0	0	1	3	45.7	110	1	108	1	137	1	28.8	0	0	0	0	1	1	1	1	0	0	1	0	0	0	1	1	2	1	0	0	0	1	0	0	1	1	1	1	1
PKC0591	0	WIMIHA	UYAWI	1	9	0	.	0	0	0	1	3	45.7	100	1	98	1	136	1	26.2	0	1	0	0	0	1	1	1	0	0	1	0	0	0	1	0	0	1	0	0	0	1	0	0	1	1	0	0	0
PKC0594	0	WIMIHA	UYAWI	1	10	1	.	52	1	1	1	2	41.5	130	0	128	0	146	1	32	0	0	0	1	1	1	1	1	0	0	1	1	0	0	1	1	2	1	0	0	0	1	1	2	1	0	0	2	1
PKC0595	0	WIMIHA	UYAWI	1	9	0	.	36	1	1	1	2	43.4	110	1	108	1	133.9	0	26.1	0	0	0	0	0	1	1	1	0	0	1	1	0	0	1	0	0	1	1	0	0	1	0	0	1	1	0	0	0
PKC0597	0	WIMIHA	UYAWI	1	9	0	.	60	1	1	1	2	43.4	120	0	118	0	130.4	0	24	0	1	0	0	0	1	1	1	0	0	1	1	0	0	1	0	0	1	1	0	0	1	0	0	1	1	0	0	0
PKC0603	0	URIMI	MISORI	1	9	0	.	0	0	0	1	3	45.7	130	0	128	0	126.3	0	25	0	0	0	1	0	1	1	1	0	0	1	0	0	0	1	1	2	1	0	0	0	1	1	2	1	0	0	2	1
PKC0604	0	URIMI	MISORI	0	9	0	.	16	1	1	1	2	43.4	120	0	118	0	137	1	26.3	0	1	0	1	0	1	1	1	0	0	1	0	0	0	1	1	1	1	1	0	0	1	0	0	1	0	0	1	1
PKC0606	0	URIMI	MISORI	1	9	0	.	164	1	2	1	.	.	.	.	.	.	.	.	.	.	0	0	1	0	1	0	1	0	0	0	1	0	0	1	0	0	1	1	0	0	1	1	2	1	0	0	1	1
PKC0607	0	URIMI	MISORI	0	10	1	.	564	1	3	1	4	46.3	100	1	98	1	129	0	24.7	0	0	0	1	0	1	1	1	0	0	1	0	0	0	1	1	1	1	1	0	0	1	0	0	1	0	0	1	1
PKC0609	0	URIMI	MISORI	0	9	0	.	636	1	3	1	3	45.7	100	1	98	1	131	0	25.6	0	0	0	0	0	1	1	1	0	0	1	0	0	0	1	1	2	1	0	0	0	1	0	0	1	0	0	1	1
PKC0613	0	URIMI	MISORI	1	9	0	.	318	1	2	1	4	48	70	1	68	1	121.5	0	23.4	0	0	0	0	0	1	1	1	0	0	1	0	0	0	1	0	0	1	0	0	0	1	0	0	1	0	0	0	0
PKC0619	0	URIMI	MISORI	0	9	0	.	676	1	3	1	3	45.7	110	1	108	1	131.3	0	29.7	0	0	0	0	0	1	1	1	0	0	1	0	0	0	1	0	0	1	0	0	0	1	0	0	1	1	0	0	0
PKC0621	0	URIMI	MISORI	0	9	0	.	132	1	2	1	4	48	100	1	98	1	129	0	25.6	0	0	0	1	0	1	1	1	0	0	1	0	0	0	1	1	2	1	0	0	0	1	1	2	1	0	0	2	1
PKC0627	0	URIMI	MISORI	1	10	1	.	8	1	1	1	4	46.3	100	1	98	1	135.8	1	30.7	0	1	0	0	0	1	1	1	0	0	1	0	0	0	1	1	2	1	0	0	0	1	1	2	1	0	0	2	1
PKC0629	0	URIMI	MISORI	0	9	0	.	540	1	3	1	3	45.7	130	0	128	0	139.5	1	33	0	0	0	0	0	1	1	1	0	0	1	0	0	0	1	1	2	1	0	0	0	1	0	0	1	1	0	1	1
PKC0631	0	URIMI	MISORI	0	10	1	.	120	1	2	1	2	41.5	120	0	118	0	126.8	0	23.4	0	1	0	1	0	1	1	1	0	0	1	0	0	0	1	1	2	1	0	0	0	1	1	2	1	0	0	2	1
PKC0635	0	URIMI	MISORI	0	9	0	.	18	1	1	1	3	45.7	70	1	68	1	121.8	0	25.4	0	0	0	1	0	1	1	1	0	0	1	0	0	0	1	0	0	1	1	0	0	1	1	2	1	0	0	1	1
PKC0637	0	URIMI	MISORI	0	9	0	.	0	0	0	1	3	45.7	70	1	68	1	125.7	0	21.7	0	1	0	1	0	1	1	1	0	0	1	0	0	0	1	1	2	1	0	0	0	1	0	0	1	1	0	1	1
PKC0639	0	URIMI	MISORI	0	10	1	.	0	0	0	1	2	41.5	70	1	68	1	143	1	32.4	0	0	0	1	0	1	1	1	0	0	1	0	0	0	1	0	0	1	1	0	0	1	0	0	1	1	0	0	0
PKC0640	0	URIMI	MISORI	0	9	0	.	336	1	2	1	3	45.7	110	1	108	1	124.7	0	25	0	0	0	0	0	1	1	1	0	0	1	1	0	0	1	0	0	1	1	0	0	1	1	2	1	0	0	1	1
PKC0641	0	URIMI	MISORI	0	9	0	.	0	0	0	1	2	43.4	90	1	88	1	132.5	0	26.8	0	1	0	0	0	1	1	1	0	0	1	1	0	0	1	1	4	1	0	0	0	1	1	2	1	0	0	2	1
PKC0649	0	WIMIHA	UYAWI	1	9	0	.	160	1	2	1	.	.	.	.	.	.	132.2	0	25.7	0	0	0	0	0	1	1	1	0	0	1	0	0	0	1	1	2	1	0	1	0	1	1	2	1	1	0	2	1
PKC0653	0	WIMIHA	UYAWI	1	10	1	.	16	1	1	1	4	46.3	130	0	128	0	135.2	1	31	0	1	0	0	0	1	1	1	0	0	1	0	0	0	1	0	0	1	0	0	0	1	0	0	1	1	0	0	0
PKC0657	0	WIMIHA	UYAWI	0	9	0	.	16	1	1	1	3	45.7	130	0	128	0	135.4	1	29.8	0	1	0	0	0	1	1	1	0	0	1	0	1	0	0	.	.	.	.	.	.	1	0	0	1	1	0	0	0
PKC0662	0	WIMIHA	UYAWI	0	10	1	.	0	0	0	1	2	41.5	80	1	78	1	130.1	0	29.1	0	0	0	0	0	1	1	1	0	0	1	0	0	0	1	1	2	1	0	1	0	1	0	0	1	1	0	1	1
PKC0663	0	WIMIHA	UYAWI	1	10	1	.	20	1	1	1	4	46.3	80	1	78	1	142	1	31.5	0	1	0	0	0	1	1	0	.	.	.	.	.	.	1	0	0	1	0	1	0	1	1	1	1	0	0	1	1
PKC0666	0	WIMIHA	UYAWI	1	10	1	.	8	1	1	1	3	43.9	100	1	98	1	131.1	0	26.7	0	0	0	0	0	1	1	1	0	0	1	0	0	0	1	0	0	1	0	0	0	1	0	0	1	1	0	0	0
PKC0667	0	WIMIHA	UYAWI	0	10	1	.	0	0	0	1	2	41.5	70	1	68	1	141.2	1	30.5	0	0	0	1	0	1	1	1	0	0	1	1	0	0	1	0	0	1	1	0	0	1	1	4	1	0	0	1	1
PKC0668	0	WIMIHA	UYAWI	0	9	0	.	68	1	1	1	.	.	100	1	98	1	139.5	1	31.5	0	0	0	0	0	1	1	1	0	0	1	1	0	0	1	1	1	1	0	0	0	1	1	2	1	0	1	2	1
PKC0669	0	WIMIHA	UYAWI	1	9	0	.	128	1	2	1	1	41.1	70	1	68	1	127.5	0	22.8	0	0	0	0	0	1	1	1	0	0	1	0	0	0	1	0	0	1	1	0	0	1	1	2	1	0	0	1	1
PKC0673	0	WIMIHA	UYAWI	0	9	0	.	0	0	0	1	4	48	80	1	78	1	139	1	28.4	0	1	0	0	0	1	1	1	0	0	1	0	0	0	1	0	0	1	1	0	0	1	1	4	1	1	0	1	1
PKC0674	0	WIMIHA	UYAWI	0	10	1	.	32	1	1	1	1	39.1	60	1	58	1	149.6	1	33.7	0	0	0	0	0	1	1	0	.	.	.	.	.	.	1	1	2	1	0	0	0	1	1	2	1	0	1	2	1
PKC0678	0	WIMIHA	UYAWI	0	9	0	.	0	0	0	1	2	43.4	110	1	108	1	127	0	24.3	0	0	0	1	0	1	1	0	.	.	.	.	.	.	1	0	0	1	1	0	0	1	0	0	1	1	0	0	0
PKC0679	0	WIMIHA	UYAWI	1	10	1	.	0	0	0	1	2	41.5	80	1	78	1	127.4	0	22.4	1	0	0	1	0	1	1	1	0	0	1	1	0	0	1	0	0	1	0	1	0	1	1	2	1	0	0	1	1
PKC0681	0	WIMIHA	UYAWI	0	10	1	.	0	0	0	1	2	41.5	130	0	128	0	143.4	1	29.7	0	0	0	1	0	1	1	1	0	0	1	0	0	0	1	0	0	1	0	1	0	1	0	0	1	0	0	0	0
PKC0686	0	WIMIHA	UYAWI	1	10	1	.	408	1	3	1	2	41.5	110	1	108	1	130.7	0	30.8	0	0	0	0	0	1	1	1	0	0	1	0	1	0	1	0	0	1	1	0	0	1	1	2	1	0	0	1	1
PKC0687	0	WIMIHA	UYAWI	0	10	1	.	56	1	1	1	3	43.9	130	0	128	0	141.2	1	34	0	0	0	1	0	1	1	0	.	.	.	.	.	.	1	0	0	1	1	0	0	1	1	1	1	0	0	1	1
PKC0693	0	WIMIHA	UYAWI	0	10	1	.	0	0	0	1	2	41.5	110	1	108	1	138.8	1	30.8	0	1	0	0	0	1	1	1	0	0	1	1	0	0	1	0	0	1	1	1	0	1	0	0	1	1	0	0	0
PKC0695	0	WIMIHA	UYAWI	0	9	0	.	0	0	0	1	3	45.7	80	1	78	1	136.3	1	25.6	0	0	0	0	0	1	1	1	0	0	1	0	0	0	1	0	0	1	1	1	0	1	0	0	1	1	1	0	0
PKC0698	0	WIMIHA	UYAWI	0	9	0	.	6	1	1	1	1	41.1	90	1	88	1	121.6	0	25	0	0	0	0	0	1	1	0	.	.	.	.	.	.	1	0	0	1	1	0	0	1	0	0	1	1	0	0	0
PKC0700	0	WIMIHA	UYAWI	1	10	1	.	0	0	0	1	5	48.7	110	1	108	1	140.1	1	33.9	0	0	0	0	0	1	1	1	0	0	1	0	0	0	1	0	0	1	1	0	0	1	1	2	1	1	0	1	1
PKC0702	0	NAYA	RANYALA	0	9	0	.	96	1	1	1	1	41.1	100	1	98	1	119.4	0	21.6	0	0	0	1	0	0	1	0	.	.	.	.	.	.	1	0	0	1	0	0	0	1	1	1	1	0	0	1	1
PKC0705	0	NAYA	RANYALA	0	9	0	.	20	1	1	1	1	41.1	100	1	98	1	118.6	0	25.1	0	0	0	0	1	1	0	0	.	.	.	.	.	.	1	0	0	1	1	0	0	1	1	2	1	0	0	1	1
PKC0706	0	NAYA	RANYALA	0	9	0	.	714	1	3	1	2	43.4	100	1	98	1	128	0	26.1	0	0	0	1	1	1	1	1	0	0	1	0	1	0	1	1	2	1	0	0	0	1	1	2	1	1	0	2	1
PKC0716	0	NAYA	RANYALA	0	9	0	.	402	1	3	1	2	43.4	100	1	98	1	112.5	0	19	0	1	0	0	1	1	1	0	.	.	.	.	.	.	1	0	0	1	0	0	0	1	1	2	1	0	0	1	1
PKC0717	0	NAYA	RANYALA	0	9	0	.	84	1	1	1	1	41.1	50	1	48	1	128.3	0	25.9	0	0	0	0	1	1	1	0	.	.	.	.	.	.	1	0	0	1	0	0	0	1	1	2	1	1	0	1	1
PKC0720	0	NAYA	RANYALA	0	9	0	.	0	0	0	1	2	43.4	140	0	138	0	120.2	0	23.2	0	0	0	0	1	1	1	0	.	.	.	.	.	.	1	0	0	1	1	0	0	1	1	2	1	0	0	1	1
PKC0734	0	NAYA	RANYALA	1	10	1	.	0	0	0	1	3	43.9	130	0	128	0	128.4	0	24.4	0	1	0	0	1	0	1	0	.	.	.	.	.	.	1	0	0	1	0	1	0	1	1	2	1	0	0	1	1
PKC0737	0	NAYA	RANYALA	0	10	1	.	408	1	3	1	2	41.5	100	1	98	1	141.5	1	32.5	0	0	0	0	1	1	1	1	0	0	1	0	0	0	1	1	2	1	0	0	0	1	1	2	1	0	0	2	1
PKC0749	0	NAYA	RANYALA	0	10	1	.	246	1	2	1	3	43.9	130	0	128	0	135	1	25.7	0	0	0	0	1	1	1	1	0	0	1	0	0	0	1	1	2	1	0	0	0	1	0	0	1	1	0	1	1
PKC0753	0	NAYA	RANYALA	1	9	0	.	448	1	3	1	5	50.3	70	1	68	1	132.6	0	27.2	0	0	0	0	0	1	1	1	0	0	1	0	0	0	1	0	0	1	0	0	0	1	1	2	1	1	0	1	1
PKC0754	0	NAYA	RANYALA	0	10	1	.	366	1	2	1	.	.	80	1	78	1	123.1	0	21.6	0	0	0	0	1	1	1	0	.	.	.	.	.	.	1	0	0	1	1	1	0	1	1	2	1	0	0	1	1
PKC0757	0	NAYA	RANYALA	0	9	0	.	160	1	2	1	3	45.7	120	0	118	0	137.3	1	29.6	0	1	0	0	1	1	1	1	0	0	1	0	0	0	1	0	0	1	0	0	0	1	0	0	1	1	0	0	0
PKC0770	0	NAYA	RANYALA	0	10	1	.	312	1	2	1	3	43.9	100	1	98	1	138.7	1	38	0	0	0	0	1	1	0	0	.	.	.	.	.	.	1	1	2	1	0	0	0	1	1	2	1	0	0	2	1
PKC0784	0	NAYA	RANYALA	1	10	1	.	0	0	0	1	2	41.5	100	1	98	1	126.7	0	22.6	0	0	0	1	1	1	1	0	.	.	.	.	.	.	1	0	0	1	1	0	0	1	1	2	1	0	0	1	1
PKC0786	0	NAYA	RANYALA	1	9	0	.	180	1	2	1	2	43.4	110	1	108	1	118.5	0	24.2	0	0	0	1	1	1	0	0	.	.	.	.	.	.	1	1	2	1	0	0	0	1	1	2	1	0	0	2	1
PKC0792	0	NAYA	RANYALA	0	9	0	.	462	1	3	1	2	43.4	130	0	128	0	128.5	0	23.2	0	0	0	0	1	1	1	0	.	.	.	.	.	.	1	1	2	1	0	0	0	1	1	1	1	0	0	2	1
PKC0804	0	NYAGUDA	NYAGUDA	1	10	1	.	176	1	2	6	4	46.3	120	0	118	0	134	0	29.4	0	0	0	0	0	0	1	0	.	.	.	.	.	.	0	.	.	.	.	.	.	1	0	0	0	0	1	0	0
PKC0807	0	NYAGUDA	NYAGUDA	0	9	0	.	0	0	0	6	2	43.4	110	1	108	1	125	0	19.7	1	0	0	0	0	1	1	1	0	0	1	0	0	0	1	1	2	1	0	0	0	1	1	2	0	1	0	2	1
PKC0808	0	NYAGUDA	NYAGUDA	1	9	0	.	36	1	1	6	2	43.4	110	1	108	1	129.5	0	27.4	0	0	0	0	0	1	1	0	.	.	.	.	.	.	.	.	.	.	.	.	.	1	1	2	1	0	0	1	1
PKC0809	0	NYAGUDA	NYAGUDA	0	10	1	.	16	1	1	6	2	41.5	130	0	128	0	128.1	0	25.3	0	1	0	1	0	0	1	1	0	0	0	1	0	0	1	0	0	0	1	0	0	1	0	0	1	1	0	0	0
PKC0811	0	NYAGUDA	NYAGUDA	1	9	0	.	0	0	0	6	4	48	70	1	68	1	124	0	22.7	0	1	0	1	1	1	1	0	.	.	.	.	.	.	1	1	2	1	0	0	0	1	0	0	1	1	0	1	1
PKC0813	0	NYAGUDA	NYAGUDA	1	10	1	.	24	1	1	6	3	43.9	140	0	138	0	131.2	0	23.1	1	0	0	0	0	1	0	1	0	0	1	0	0	0	1	1	2	1	0	0	0	1	1	2	1	0	0	2	1
PKC0818	0	NYAGUDA	NYAGUDA	0	9	0	.	632	1	3	6	5	50.3	120	0	118	0	134.7	0	27.2	0	0	0	1	0	1	1	0	.	.	.	.	.	.	1	1	4	1	0	0	0	1	1	2	1	1	0	2	1
PKC0820	0	NYAGUDA	NYAGUDA	1	9	0	.	384	1	2	6	4	48	80	1	78	1	128.5	0	25.8	0	1	0	0	0	1	1	0	.	.	.	.	.	.	1	0	0	0	1	0	0	1	1	2	1	0	0	1	1
PKC0824	0	NYAGUDA	NYAGUDA	1	9	0	.	0	0	0	6	5	50.3	100	1	98	1	130.3	0	26.3	0	0	0	1	0	1	1	1	.	.	.	.	.	.	1	1	2	1	0	0	0	1	1	2	1	0	0	2	1
PKC0825	0	NYAGUDA	NYAGUDA	0	10	1	.	16	1	1	6	5	48.7	40	1	38	1	131.2	0	25.8	0	0	0	0	0	1	0	1	0	0	1	0	0	0	1	1	2	1	0	0	0	1	1	4	1	0	0	2	1
PKC0826	0	NYAGUDA	NYAGUDA	0	9	0	.	32	1	1	6	5	50.3	100	1	98	1	127.8	0	23.1	0	0	0	1	0	1	1	1	0	0	1	0	0	0	1	1	0	1	0	0	0	1	0	0	1	0	0	1	1
PKC0827	0	NYAGUDA	NYAGUDA	1	10	1	.	36	1	1	6	6	51.1	100	1	98	1	138.7	1	26.3	1	1	0	0	0	0	1	0	.	.	.	.	.	.	0	.	.	.	.	.	.	1	1	2	1	0	0	1	1
PKC0835	0	NYAGUDA	NYAGUDA	0	9	0	.	324	1	2	6	4	48	70	1	68	1	132	0	24.9	0	0	0	1	0	1	0	0	.	.	.	.	.	.	1	0	0	1	1	0	0	1	0	0	1	1	0	0	0
PKC0839	0	NYAGUDA	NYAGUDA	1	10	1	.	220	1	2	6	2	41.5	120	0	118	0	119.7	0	23.9	0	1	0	1	0	1	0	0	.	.	.	.	.	.	1	.	.	.	.	.	.	1	1	2	1	0	0	1	1
PKC0841	0	AKUOM	AKUOM	0	9	0	.	152	1	2	6	.	.	120	0	118	0	126.6	0	24.9	0	1	0	1	1	1	1	1	0	0	1	0	0	0	1	0	0	1	1	0	0	1	0	0	1	1	0	0	0
PKC0842	0	AKUOM	AKUOM	0	9	0	.	120	1	2	6	.	.	90	1	88	1	135.2	1	28.4	0	1	0	1	1	1	1	0	.	.	.	.	.	.	1	0	0	1	1	0	0	1	0	0	1	1	0	0	0
PKC0843	0	AKUOM	AKUOM	0	9	0	.	60	1	1	6	.	.	140	0	138	0	130.8	0	25	0	0	0	1	1	1	1	1	0	0	0	1	0	0	1	1	2	1	0	0	0	1	0	0	1	1	0	1	1
PKC0844	0	AKUOM	AKUOM	0	9	0	.	6	1	1	6	.	.	110	1	108	1	134.8	0	30.2	0	0	0	1	0	1	1	1	0	0	1	0	0	0	1	1	2	1	0	0	0	1	1	2	1	0	0	2	1
PKC0845	0	AKUOM	AKUOM	0	9	0	.	126	1	2	6	.	.	110	1	108	1	133	0	25.2	0	0	0	1	1	1	1	0	.	.	.	.	.	.	1	1	1	1	0	0	0	1	1	2	1	0	0	2	1
PKC0849	0	AKUOM	AKUOM	1	10	1	.	128	1	2	6	.	.	100	1	98	1	136	1	28.7	0	0	0	1	1	1	0	1	0	0	1	0	0	0	1	0	0	1	0	1	0	1	1	2	1	0	0	1	1
PKC0850	0	AKUOM	AKUOM	0	9	0	.	0	0	0	6	.	.	130	0	128	0	130.3	0	31.5	0	1	0	1	1	1	1	1	0	0	1	0	0	0	1	1	2	1	0	0	0	1	1	2	1	1	0	2	1
PKC0853	0	AKUOM	AKUOM	1	10	1	.	8	1	1	6	.	.	110	1	108	1	137.4	1	28.1	0	0	0	1	1	1	1	1	0	0	1	0	0	0	1	1	0	1	1	0	0	1	0	0	1	0	0	1	1
PKC0854	0	AKUOM	AKUOM	1	10	1	.	64	1	1	6	.	.	110	1	108	1	.	.	.	.	0	0	0	1	1	1	1	0	0	1	0	0	0	1	0	0	1	1	0	0	1	1	2	1	1	0	1	1
PKC0858	0	AKUOM	AKUOM	1	10	1	.	0	0	0	6	.	.	130	0	128	0	129.3	0	27.7	0	0	0	1	1	1	0	0	.	.	.	.	.	.	1	1	2	1	0	0	0	1	1	2	1	0	0	2	1
PKC0859	0	AKUOM	AKUOM	1	10	1	.	4	1	1	6	1	39.1	130	0	128	0	130.5	0	27.1	0	0	0	0	1	1	1	0	.	.	.	.	.	.	0	.	.	.	.	.	.	1	0	0	1	0	0	0	0
PKC0861	0	AKUOM	AKUOM	0	10	1	.	0	0	0	6	.	.	130	0	128	0	.	.	.	.	0	0	1	1	1	1	1	0	0	1	1	0	0	1	1	2	1	0	0	0	1	1	2	1	1	0	2	1
PKC0863	0	AKUOM	AKUOM	0	10	1	.	48	1	1	6	.	.	140	0	138	0	127.1	0	23.2	0	0	0	0	1	1	1	1	0	0	1	0	1	0	1	0	0	1	0	0	0	1	1	2	1	1	0	1	1
PKC0864	0	AKUOM	AKUOM	0	10	1	.	66	1	1	6	.	.	80	1	78	1	135.9	1	27.8	0	1	0	1	1	1	1	0	.	.	.	.	.	.	1	0	0	1	1	0	0	1	1	2	1	0	0	1	1
PKC0865	0	AKUOM	AKUOM	0	10	1	.	168	1	2	6	.	.	110	1	108	1	134.7	0	30.8	0	1	0	1	1	1	1	0	.	.	.	.	.	.	1	0	0	1	0	0	0	1	0	0	1	0	0	0	0
PKC0866	0	AKUOM	AKUOM	1	10	1	.	16	1	1	6	.	.	120	0	118	0	126.8	0	24.4	0	1	0	0	1	1	1	0	.	.	.	.	.	.	1	0	0	1	1	0	0	1	1	2	1	0	0	1	1
PKC0867	0	AKUOM	AKUOM	0	10	1	.	0	0	0	6	.	.	110	1	108	1	138.7	1	31.1	0	0	0	0	1	1	1	0	.	.	.	.	.	.	1	0	0	1	0	1	0	1	0	0	1	0	0	0	0
PKC0869	0	AKUOM	AKUOM	1	10	1	.	16	1	1	6	.	.	100	1	98	1	135.5	1	27.1	0	1	0	0	1	1	1	0	.	.	.	.	.	.	0	.	.	.	.	.	.	1	0	0	1	1	0	0	0
PKC0874	0	AKUOM	AKUOM	1	10	1	.	4	1	1	6	.	.	110	1	108	1	131.4	0	26.3	0	0	0	1	1	1	0	0	.	.	.	.	.	.	1	0	0	1	1	0	0	1	1	2	1	0	0	1	1
PKC0875	0	AKUOM	AKUOM	0	11	1	.	40	1	1	6	.	.	120	0	118	0	146.7	1	34.5	0	0	0	0	1	1	0	0	.	.	.	.	.	.	1	0	0	1	0	0	0	1	1	2	1	0	0	1	1
PKC0881	0	AKUOM	AKUOM	0	9	0	.	4	1	1	6	.	.	130	0	128	0	133.5	0	23.7	0	0	0	1	1	1	1	0	.	.	.	.	.	.	1	0	0	1	1	0	0	1	1	2	1	0	0	1	1
PKC0883	0	AKUOM	AKUOM	1	11	1	.	468	1	3	6	.	.	140	0	138	0	147	1	33.2	0	0	0	1	1	1	0	0	.	.	.	.	.	.	1	1	2	1	0	0	0	1	0	0	1	1	0	1	1
PKC0886	0	LWALA	AKOUM	0	11	1	.	196	1	2	1	.	.	110	1	108	1	133.5	0	29.3	0	0	0	1	1	1	1	1	0	0	1	0	0	0	1	1	2	1	0	0	0	1	1	2	1	0	0	2	1
PKC0927	0	AKUOM	AKUOM	0	11	1	.	64	1	1	6	.	.	140	0	138	0	145.5	1	35.4	0	0	0	1	1	1	1	1	0	0	1	0	0	0	1	1	2	1	0	0	0	1	1	4	1	0	0	2	1
PKC0928	0	AKUOM	AKUOM	0	11	1	.	20	1	1	6	.	.	120	0	118	0	139.5	1	31.1	0	0	0	1	1	1	0	0	.	.	.	.	.	.	1	1	2	1	0	0	0	1	1	4	1	0	0	2	1
PKC0930	0	AKUOM	AKUOM	0	10	1	.	664	1	3	6	.	.	80	1	78	1	127	0	14	1	1	0	1	1	1	1	1	0	0	1	0	0	0	1	1	2	1	0	0	0	1	1	2	1	1	0	2	1
TC0271	1	ISAMILO	CHOLE	0	9	0	4	0	0	0	6	3	45.6868	121	0	119	0	125.4	0	25	0	1	0	0	1	1	1	0	.	.	.	.	.	.	1	1	2	1	0	0	0	1	1	2	1	0	0	2	1
TC0273	1	ISAMILO	CHOLE	0	10	1	4	16	1	1	6	4	46.285	114	1	112	1	130.5	0	28	0	0	0	0	0	1	1	0	.	.	.	.	.	.	1	1	2	1	0	0	0	1	1	2	1	1	0	2	1
TC0274	1	ISAMILO	CHOLE	0	10	1	4	28	1	1	6	5	48.672	131	0	129	0	125.45	0	23	0	1	0	1	0	1	0	0	.	.	.	.	.	.	1	1	2	1	0	1	0	1	0	0	1	1	1	1	1
TC0275	1	ISAMILO	CHOLE	0	10	1	4	0	0	0	6	7	53.446	116	0	114	1	135.6	1	30.5	0	1	0	1	1	1	1	0	.	.	.	.	.	.	1	0	0	1	1	0	0	1	1	2	1	0	1	1	1
TC0276	1	ISAMILO	CHOLE	0	10	1	4	56	1	1	6	6	51.059	141	0	139	0	130.3	0	30	0	0	0	1	1	1	1	0	.	.	.	.	.	.	1	1	2	1	0	1	0	1	0	0	1	1	1	1	1
TC0277	1	ISAMILO	CHOLE	0	10	1	4	0	0	0	6	5	48.672	116	0	114	1	143	1	35	0	0	0	1	1	1	1	0	.	.	.	.	.	.	1	1	2	0	0	0	0	1	1	2	1	0	0	2	1
TC0278	1	ISAMILO	CHOLE	0	10	1	4	12	1	1	6	4	46.285	116	0	114	1	145.8	1	41	0	0	0	1	1	1	1	0	.	.	.	.	.	.	1	1	2	0	0	0	0	1	1	2	1	0	1	2	1
TC0279	1	ISAMILO	CHOLE	0	10	1	4	0	0	0	6	6	51.059	114	1	112	1	132.6	0	32	0	0	0	1	1	1	1	0	.	.	.	.	.	.	1	0	0	0	1	0	0	1	1	2	1	1	0	1	1
TC0280	1	ISAMILO	CHOLE	0	10	1	4	8	1	1	6	7	53.446	147	0	145	0	146.8	1	34	0	1	0	1	1	1	1	0	.	.	.	.	.	.	1	0	0	1	1	1	0	1	1	2	1	0	1	1	1
TC0282	1	ISAMILO	CHOLE	0	10	1	4	0	0	0	6	6	51.059	147	0	145	0	139.7	1	32	0	1	0	1	1	0	1	0	.	.	.	.	.	.	1	1	2	1	0	0	0	1	1	2	1	0	0	2	1
TC0283	1	ISAMILO	CHOLE	0	10	1	4	0	0	0	6	7	53.446	112	1	110	1	136.6	1	34	0	1	0	1	1	0	1	0	.	.	.	.	.	.	1	0	0	0	1	0	0	1	1	2	1	0	0	1	1
TC0284	1	ISAMILO	CHOLE	1	10	1	4	0	0	0	6	6	51.059	114	1	112	1	137.9	1	30.5	0	0	0	1	1	0	1	0	.	.	.	.	.	.	1	1	2	1	0	0	0	1	0	0	1	1	0	1	1
TC0285	1	ISAMILO	CHOLE	1	10	1	4	0	0	0	6	5	48.672	116	0	114	1	139.7	1	30	0	1	0	1	0	0	1	0	.	.	.	.	.	.	1	1	2	1	0	0	0	1	1	2	1	0	1	2	1
TC0286	1	ISAMILO	CHOLE	1	10	1	4	12	1	1	6	4	46.285	115	0	113	1	129.5	0	24	0	1	0	1	1	0	0	0	.	.	.	.	.	.	1	1	2	0	0	1	0	1	1	2	1	0	1	2	1
TC0287	1	ISAMILO	CHOLE	1	10	1	4	24	1	1	6	4	46.285	112	1	110	1	133.4	0	29	0	1	0	1	1	0	1	0	.	.	.	.	.	.	1	1	2	1	0	0	0	1	1	2	1	0	0	2	1
TC0288	1	ISAMILO	CHOLE	1	10	1	4	0	0	0	6	8	55.833	117	0	115	0	139.7	1	31	0	1	0	1	1	0	0	0	.	.	.	.	.	.	1	1	4	1	0	0	0	1	1	4	1	0	0	2	1
TC0289	1	ISAMILO	CHOLE	1	10	1	4	0	0	0	6	8	55.833	112	1	110	1	144.2	1	33	0	1	0	1	1	1	1	0	.	.	.	.	.	.	1	0	0	0	1	0	0	1	1	2	1	0	0	1	1
TC0290	1	ISAMILO	CHOLE	0	10	1	4	0	0	0	6	4	46.285	159	0	157	0	149.3	1	35	0	0	0	1	0	1	1	0	.	.	.	.	.	.	1	1	2	1	0	1	0	1	1	2	1	0	0	2	1
TC0291	1	ISAMILO	CHOLE	0	10	1	4	0	0	0	6	1	39.124	114	1	112	1	146	1	39	0	1	0	0	0	1	1	0	.	.	.	.	.	.	1	1	2	1	0	0	0	1	1	2	1	0	0	2	1
TC0292	1	ISAMILO	CHOLE	0	10	1	4	0	0	0	6	2	41.511	112	1	110	1	139.2	1	33.5	0	0	0	1	0	0	1	0	.	.	.	.	.	.	1	1	2	0	1	0	0	1	1	2	1	0	0	2	1
TC0293	1	ISAMILO	CHOLE	0	10	1	4	0	0	0	6	5	48.672	116	0	114	1	137.1	1	35	0	1	0	0	0	1	1	1	0	0	1	0	0	0	1	1	2	1	0	0	0	1	0	0	1	1	0	1	1
TC0294	1	ISAMILO	CHOLE	0	10	1	4	0	0	0	6	7	53.446	117	0	115	0	146.3	1	39.5	0	0	0	1	0	1	1	0	.	.	.	.	.	.	1	0	0	0	1	0	0	1	1	2	1	0	0	1	1
TC0295	1	ISAMILO	CHOLE	0	9	0	4	0	0	0	6	4	47.997	113	1	111	1	139.9	1	34	0	1	0	1	0	0	1	0	.	.	.	.	.	.	1	1	2	1	0	0	0	1	1	2	1	0	0	2	1
TC0296	1	ISAMILO	CHOLE	0	9	0	4	0	0	0	6	3	45.6868	112	1	110	1	139.7	1	30	0	1	0	0	0	0	1	0	.	.	.	.	.	.	1	1	2	1	0	1	0	1	1	2	1	0	1	2	1
TC0298	1	ISAMILO	CHOLE	0	10	1	4	0	0	0	6	2	41.511	111	1	109	1	129.05	0	29	0	1	0	1	0	1	1	0	.	.	.	.	.	.	1	1	2	1	0	0	0	1	0	0	1	1	0	1	1
TC0301	1	ISAMILO	CHOLE	1	10	1	4	0	0	0	6	6	51.059	135	0	133	0	150.1	1	42	0	0	0	0	0	1	1	0	.	.	.	.	.	.	1	0	0	1	0	1	0	1	1	2	1	0	0	1	1
TC0304	1	ISAMILO	CHOLE	1	10	1	4	0	0	0	6	5	48.672	113	1	111	1	143	1	36	0	1	0	0	0	1	1	0	.	.	.	.	.	.	1	0	0	0	1	0	0	1	1	2	1	0	0	1	1
TC0305	1	ISAMILO	CHOLE	1	10	1	4	0	0	0	6	4	46.285	113	1	111	1	137.25	1	36	0	1	0	0	0	1	1	0	.	.	.	.	.	.	1	0	0	0	1	0	0	1	1	2	1	0	0	1	1
TC0306	1	ISAMILO	CHOLE	1	10	1	4	4	1	1	6	2	41.511	132	0	130	0	139.4	1	31	0	1	0	1	0	1	0	0	.	.	.	.	.	.	1	0	0	0	1	0	0	1	1	2	1	0	0	1	1
TC0308	1	ISAMILO	CHOLE	1	10	1	4	0	0	0	6	7	53.446	117	0	115	0	139.1	1	35	0	1	0	1	0	1	1	0	.	.	.	.	.	.	1	0	0	0	1	1	0	1	1	2	1	0	0	1	1
TC0309	1	ISAMILO	CHOLE	1	10	1	4	0	0	0	6	6	51.059	100	1	98	1	144	1	34	0	1	0	1	0	1	1	1	0	0	0	1	0	0	1	1	2	1	0	0	0	1	1	2	1	0	0	2	1
TC0310	1	ISAMILO	CHOLE	1	10	1	4	0	0	0	6	3	43.898	100	1	98	1	132.8	0	34	0	1	0	1	0	1	1	0	.	.	.	.	.	.	1	1	2	1	0	0	0	1	1	2	1	0	0	2	1
TC0311	1	ISAMILO	CHOLE	1	10	1	4	0	0	0	6	2	41.511	116	0	114	1	140	1	37	0	0	0	1	0	1	1	0	.	.	.	.	.	.	1	1	2	1	0	0	0	1	1	2	1	0	0	2	1
TC0312	1	ISAMILO	CHOLE	1	10	1	4	0	0	0	6	5	48.672	118	0	116	0	134.6	0	33	0	1	0	0	0	1	1	0	.	.	.	.	.	.	1	0	0	1	1	0	0	1	1	2	1	0	0	1	1
TC0313	1	ISAMILO	CHOLE	1	10	1	4	0	0	0	6	3	43.898	112	1	110	1	130.5	0	27	0	1	0	1	0	1	1	0	.	.	.	.	.	.	1	0	0	1	1	0	0	1	1	2	1	0	0	1	1
TC0315	1	ISAMILO	CHOLE	1	10	1	4	0	0	0	6	9	58.22	135	0	133	0	147.3	1	36	0	1	0	1	0	1	1	0	.	.	.	.	.	.	1	1	2	1	0	1	0	1	1	2	1	0	1	2	1
TC0316	1	ISAMILO	CHOLE	0	10	1	4	0	0	0	6	3	43.898	118	0	116	0	139.2	1	35	0	1	0	0	0	1	1	0	.	.	.	.	.	.	1	0	0	0	1	0	0	1	1	2	1	0	0	1	1
TC0317	1	ISAMILO	CHOLE	0	10	1	4	0	0	0	6	2	41.511	112	1	110	1	127	0	31	0	0	0	1	0	1	1	0	.	.	.	.	.	.	1	0	0	0	1	0	0	1	1	2	1	0	1	1	1
TC0318	1	ISAMILO	CHOLE	0	10	1	4	0	0	0	6	2	41.511	110	1	108	1	124.9	0	27	0	1	0	1	0	1	1	0	.	.	.	.	.	.	1	0	0	0	1	0	0	1	0	0	1	1	0	0	0
TC0319	1	ISAMILO	CHOLE	1	10	1	4	0	0	0	6	1	39.124	114	1	112	1	136.1	1	34.5	0	1	0	0	0	1	1	0	.	.	.	.	.	.	1	0	0	1	1	0	0	1	1	2	1	0	0	1	1
TC0320	1	ISAMILO	CHOLE	1	10	1	4	0	0	0	6	9	58.22	131	0	129	0	143	1	34	0	1	0	1	0	1	1	0	.	.	.	.	.	.	1	1	2	1	0	0	0	1	1	2	1	0	0	2	1
TC0321	1	ISAMILO	CHOLE	0	10	1	4	0	0	0	6	4	46.285	138	0	136	0	145.8	1	40	0	0	0	1	1	1	1	0	.	.	.	.	.	.	1	0	0	0	1	0	0	1	1	2	1	0	0	1	1
TC0323	1	ISAMILO	CHOLE	0	10	1	4	0	0	0	6	5	48.672	128	0	126	0	145.7	1	34	0	1	0	1	1	1	1	0	.	.	.	.	.	.	1	0	0	0	1	1	0	1	0	0	1	0	1	0	0
TC0324	1	ISAMILO	CHOLE	0	10	1	4	0	0	0	6	3	43.898	119	0	117	0	132	0	29	0	1	0	0	1	1	1	0	.	.	.	.	.	.	1	0	0	0	1	1	0	1	1	2	1	0	0	1	1
TC0325	1	ISAMILO	CHOLE	0	10	1	4	0	0	0	6	6	51.059	117	0	115	0	133.1	0	32	0	1	0	1	1	1	1	0	.	.	.	.	.	.	1	0	0	1	1	0	0	1	1	2	1	0	0	1	1
TC0326	1	ISAMILO	CHOLE	0	10	1	4	12	1	1	6	6	51.059	119	0	117	0	135.6	1	30	0	0	0	1	1	1	1	0	.	.	.	.	.	.	1	1	2	1	0	1	0	1	1	2	1	0	1	2	1
TC0327	1	ISAMILO	CHOLE	0	10	1	4	4	1	1	6	3	43.898	128	0	126	0	148	1	39	0	1	0	1	1	1	1	0	.	.	.	.	.	.	1	0	0	0	1	0	0	1	0	0	1	1	0	0	0
TC0328	1	ISAMILO	CHOLE	1	10	1	4	0	0	0	6	10	60.607	140	0	138	0	147.3	1	46	0	0	0	1	1	1	1	0	.	.	.	.	.	.	1	1	2	1	0	0	0	1	1	2	1	0	0	2	1
TC0329	1	ISAMILO	CHOLE	0	10	1	4	0	0	0	6	3	43.898	136	0	134	0	148.1	1	40	0	1	0	1	1	1	1	0	.	.	.	.	.	.	1	1	2	0	1	0	0	1	1	2	1	0	0	2	1
TC0330	1	ISAMILO	CHOLE	0	10	1	4	0	0	0	6	3	43.898	125	0	123	0	126.5	0	25	0	0	0	1	1	1	1	0	.	.	.	.	.	.	1	0	0	0	1	1	0	1	1	2	1	0	0	1	1
TC0332	1	ISAMILO	CHOLE	0	10	1	4	0	0	0	6	6	51.059	130	0	128	0	125.9	0	25	0	0	0	1	1	1	1	0	.	.	.	.	.	.	1	1	2	1	0	1	0	1	1	2	1	0	1	2	1
TC0334	1	ISAMILO	CHOLE	0	10	1	4	28	1	1	6	3	43.898	140	0	138	0	142.2	1	54	0	0	0	1	1	1	1	0	.	.	.	.	.	.	1	0	0	0	1	0	0	1	0	0	1	1	0	0	0
TC0335	1	ISAMILO	CHOLE	0	10	1	4	20	1	1	6	3	43.898	127	0	125	0	144.2	1	35	0	1	0	1	1	1	1	0	.	.	.	.	.	.	1	1	2	1	0	1	0	1	1	2	1	0	1	2	1
TC0336	1	ISAMILO	CHOLE	1	10	1	4	0	0	0	6	8	55.833	131	0	129	0	136.3	1	32	0	1	0	1	0	1	1	0	.	.	.	.	.	.	1	0	0	0	1	0	0	1	0	0	1	1	0	0	0
TC0337	1	ISAMILO	CHOLE	1	10	1	3	4	1	1	6	2	41.511	132	0	130	0	132.8	0	34	0	1	0	1	0	1	1	0	.	.	.	.	.	.	1	1	2	1	0	0	0	1	1	2	0	1	0	2	1
TC0338	1	ISAMILO	CHOLE	0	10	1	4	20	1	1	6	7	53.446	128	0	126	0	127	0	30	0	1	0	1	0	1	1	0	.	.	.	.	.	.	1	1	2	1	0	0	0	1	1	2	1	0	1	2	1
TC0343	1	ISAMILO	CHOLE	1	10	1	4	72	1	1	6	.	.	136	0	134	0	151.8	1	37	0	0	0	1	0	1	0	0	.	.	.	.	.	.	1	0	0	0	1	0	0	1	1	2	1	0	0	1	1
TC0344	1	ISAMILO	CHOLE	1	10	1	4	12	1	1	6	8	55.833	118	0	116	0	137.6	1	31	0	1	0	0	0	1	1	0	.	.	.	.	.	.	1	1	2	1	0	0	0	1	1	2	1	0	0	2	1
TC0345	1	ISAMILO	CHOLE	1	10	1	4	0	0	0	6	8	55.833	119	0	117	0	146.3	1	38	0	1	0	0	0	1	1	0	.	.	.	.	.	.	1	0	0	1	1	0	0	1	1	2	1	0	0	1	1
TC0347	1	ISAMILO	CHOLE	0	10	1	4	4	1	1	6	2	41.511	131	0	129	0	138.4	1	31	0	0	0	1	0	1	1	0	.	.	.	.	.	.	1	0	0	1	1	0	0	1	1	2	1	0	0	1	1
TC0348	1	ISAMILO	CHOLE	1	10	1	4	24	1	1	6	4	46.285	118	0	116	0	129.8	0	29	0	1	0	1	0	1	1	0	.	.	.	.	.	.	1	0	0	1	1	0	0	1	1	2	1	0	0	1	1
TC0349	1	ISAMILO	CHOLE	1	10	1	4	4	1	1	6	4	46.285	112	1	110	1	132.3	0	29.1	0	0	0	1	0	1	1	0	.	.	.	.	.	.	1	1	2	1	0	0	0	1	1	2	1	0	0	2	1
TC0350	1	ISAMILO	CHOLE	0	10	1	4	0	0	0	6	3	43.898	119	0	117	0	135.6	1	34	0	0	0	1	0	1	1	0	.	.	.	.	.	.	1	0	0	0	1	0	0	1	0	0	1	1	0	0	0
TC0352	1	ISAMILO	CHOLE	1	10	1	4	0	0	0	6	4	46.285	.	.	.	.	134.8	0	26.5	0	1	0	0	0	0	1	0	.	.	.	.	.	.	1	0	0	1	1	0	0	1	0	0	1	1	0	0	0
TC0361	1	NYAMATONGO	NYAMATONGO	0	10	1	3	0	0	0	1	.	.	111	1	109	1	129	0	29	0	1	0	1	1	0	1	1	0	0	1	0	0	0	1	1	2	1	0	0	0	1	1	2	1	0	0	2	1
TC0362	1	NYAMATONGO	NYAMATONGO	0	10	1	4	88	1	1	1	6	51.059	114	1	112	1	132	0	30	0	1	0	0	1	0	1	0	.	.	.	.	.	.	1	1	2	1	0	0	0	1	1	2	1	0	0	2	1
TC0363	1	NYAMATONGO	NYAMATONGO	0	10	1	3	12	1	1	1	2	41.511	116	0	114	1	139	1	34	0	1	0	1	1	0	1	1	1	2	1	0	0	1	1	1	2	1	0	0	0	1	0	0	1	1	0	2	1
TC0364	1	NYAMATONGO	NYAMATONGO	0	10	1	4	0	0	0	1	2	41.511	114	1	112	1	138.2	1	30	0	1	0	0	0	0	1	1	0	0	1	1	0	1	1	0	0	1	1	0	0	1	0	0	1	1	0	0	0
TC0365	1	NYAMATONGO	NYAMATONGO	0	10	1	3	16	1	1	1	3	43.898	117	0	115	0	129.5	0	28	0	1	0	0	1	0	1	1	1	2	1	0	0	1	1	1	2	1	0	0	0	1	1	2	1	0	0	3	1
TC0366	1	NYAMATONGO	NYAMATONGO	0	10	1	4	0	0	0	1	2	41.511	116	0	114	1	144.2	1	35	0	1	0	0	1	0	1	1	1	4	1	0	0	1	1	1	2	1	0	0	0	1	1	2	1	0	0	3	1
TC0367	1	NYAMATONGO	NYAMATONGO	0	10	1	4	0	0	0	1	2	41.511	114	1	112	1	132	0	29	0	0	0	0	0	0	1	1	0	0	1	0	0	1	1	1	2	1	0	0	0	1	1	2	1	0	0	2	1
TC0368	1	NYAMATONGO	NYAMATONGO	0	10	1	4	0	0	0	1	4	46.285	112	1	110	1	138.05	1	31	0	1	0	0	1	0	1	1	0	0	0	1	0	1	1	1	2	1	0	0	0	1	0	0	1	1	0	1	1
TC0369	1	NYAMATONGO	NYAMATONGO	0	10	1	4	0	0	0	1	4	46.285	116	0	114	1	134.8	0	30	0	1	0	1	1	1	1	1	0	0	1	0	0	1	1	1	2	1	0	0	0	1	1	2	1	0	0	2	1
TC0370	1	NYAMATONGO	NYAMATONGO	0	10	1	4	0	0	0	1	5	48.672	111	1	109	1	135.6	1	28	0	1	0	0	1	0	1	1	0	0	1	0	0	1	1	1	4	1	0	0	0	1	1	2	1	0	0	2	1
TC0371	1	NYAMATONGO	NYAMATONGO	0	10	1	3	0	0	0	1	3	43.898	117	0	115	0	127.7	0	27	0	1	0	0	0	0	1	1	0	0	1	0	0	1	1	1	2	1	0	0	0	1	1	2	1	0	0	2	1
TC0372	1	NYAMATONGO	NYAMATONGO	0	10	1	3	0	0	0	1	2	41.511	112	1	110	1	133.1	0	31	0	0	0	0	1	0	1	1	1	2	1	0	0	1	1	1	2	1	0	0	0	1	1	2	1	0	0	3	1
TC0373	1	NYAMATONGO	NYAMATONGO	0	10	1	4	0	0	0	1	2	41.511	116	0	114	1	132.1	0	31	0	1	0	0	1	1	1	1	1	2	1	0	0	1	1	1	2	1	0	0	0	1	1	2	1	0	0	3	1
TC0374	1	NYAMATONGO	NYAMATONGO	0	10	1	4	0	0	0	1	2	41.511	111	1	109	1	129.5	0	27	0	1	0	0	1	0	1	1	0	0	1	0	0	1	1	1	2	1	0	0	0	1	1	2	1	0	0	2	1
TC0375	1	NYAMATONGO	NYAMATONGO	0	9	0	4	0	0	0	1	2	43.3766	112	1	110	1	138.2	1	29	0	1	0	0	1	0	1	1	1	2	1	0	0	1	1	1	2	1	0	0	0	1	1	2	1	0	0	3	1
TC0376	1	NYAMATONGO	NYAMATONGO	0	10	1	4	0	0	0	1	2	41.511	114	1	112	1	127	0	26	0	0	0	0	1	0	1	1	0	0	1	0	0	0	1	1	2	1	0	0	0	1	1	2	1	0	0	2	1
TC0377	1	NYAMATONGO	NYAMATONGO	0	9	0	4	0	0	0	1	4	47.997	118	0	116	0	138.6	1	34	0	0	0	1	0	1	1	1	0	0	0	1	0	0	1	1	2	0	1	0	0	1	1	2	1	1	0	2	1
TC0378	1	NYAMATONGO	NYAMATONGO	0	9	0	4	0	0	0	1	3	45.6868	111	1	109	1	142.2	1	33	0	1	0	1	1	0	1	1	1	2	1	0	0	0	1	0	0	0	1	0	0	1	0	0	1	1	0	1	1
TC0379	1	NYAMATONGO	NYAMATONGO	0	10	1	3	0	0	0	1	5	48.672	130	0	128	0	134.6	0	29	0	0	1	0	1	1	1	1	1	4	1	0	0	0	1	1	2	0	0	0	0	1	1	2	1	0	0	3	1
TC0382	1	NYAMATONGO	NYAMATONGO	0	9	0	3	4	1	1	1	1	41.0664	122	0	120	0	133.15	0	33	0	1	0	1	1	0	1	0	.	.	.	.	.	.	1	1	2	1	1	0	0	1	1	2	1	0	0	2	1
TC0383	1	NYAMATONGO	NYAMATONGO	0	10	1	3	0	0	0	1	4	46.285	118	0	116	0	129	0	26	0	1	0	0	1	0	1	1	0	0	1	0	0	0	1	0	0	1	1	0	0	1	1	2	1	0	0	1	1
TC0384	1	NYAMATONGO	NYAMATONGO	0	10	1	3	0	0	0	1	5	48.672	121	0	119	0	131	0	30	0	1	0	0	1	0	1	0	.	.	.	.	.	.	1	1	2	1	0	0	0	1	1	2	1	0	0	2	1
TC0385	1	NYAMATONGO	NYAMATONGO	0	9	0	3	0	0	0	1	2	43.3766	121	0	119	0	130	0	27	0	1	0	1	0	0	1	1	1	2	1	0	0	0	1	1	2	1	0	0	0	1	1	2	1	0	0	3	1
TC0386	1	NYAMATONGO	NYAMATONGO	1	10	1	3	0	0	0	1	5	48.672	121	0	119	0	129.5	0	25.5	0	1	0	0	0	0	1	1	1	2	1	0	0	0	1	1	2	1	0	0	0	1	1	2	1	0	0	3	1
TC0387	1	NYAMATONGO	NYAMATONGO	1	9	0	2	0	0	0	1	2	43.3766	134	0	132	0	122.9	0	27	0	0	0	1	1	0	1	1	0	0	1	0	0	0	1	1	2	1	0	0	0	1	1	2	1	0	0	2	1
TC0388	1	NYAMATONGO	NYAMATONGO	1	10	1	4	0	0	0	1	3	43.898	138	0	136	0	149.8	1	39	0	1	0	0	1	0	1	1	0	0	1	1	0	0	1	1	2	1	0	0	0	1	0	0	1	1	0	1	1
TC0389	1	NYAMATONGO	NYAMATONGO	1	10	1	3	0	0	0	1	2	41.511	121	0	119	0	132.15	0	27	0	1	0	0	1	0	1	1	0	0	1	0	0	0	1	1	2	1	0	0	0	1	0	0	1	1	0	1	1
TC0390	1	NYAMATONGO	NYAMATONGO	1	10	1	3	0	0	0	1	3	43.898	132	0	130	0	130.3	0	30	0	0	0	0	1	0	1	0	.	.	.	.	.	.	1	1	2	1	0	0	0	1	0	0	1	1	0	1	1
TC0391	1	NYAMATONGO	NYAMATONGO	1	9	0	4	0	0	0	1	6	52.6174	121	0	119	0	127	0	27	0	1	0	0	1	0	1	1	0	0	1	0	0	0	1	1	2	1	0	0	0	1	1	2	1	0	0	2	1
TC0392	1	NYAMATONGO	NYAMATONGO	1	9	0	3	0	0	0	1	3	45.6868	128	0	126	0	128	0	27	0	0	0	0	1	0	1	1	0	0	1	0	0	0	1	1	2	1	0	0	0	1	1	2	1	0	0	2	1
TC0393	1	NYAMATONGO	NYAMATONGO	1	10	1	3	0	0	0	1	4	46.285	131	0	129	0	130.5	0	30	0	0	0	0	0	0	1	1	1	2	1	1	0	0	1	1	2	1	0	0	0	1	1	2	1	0	0	3	1
TC0395	1	NYAMATONGO	NYAMATONGO	1	9	0	3	0	0	0	1	3	45.6868	118	0	116	0	129	0	27.5	0	1	0	1	0	0	1	1	0	0	1	0	0	0	1	1	2	1	0	0	0	1	1	2	1	0	0	2	1
TC0396	1	NYAMATONGO	NYAMATONGO	1	10	1	2	0	0	0	1	3	43.898	122	0	120	0	128	0	25	0	1	0	1	1	0	1	0	.	.	.	.	.	.	1	1	2	1	0	0	0	1	0	0	1	1	0	1	1
TC0397	1	NYAMATONGO	NYAMATONGO	1	9	0	3	0	0	0	1	2	43.3766	134	0	132	0	133	0	34	0	1	0	0	1	0	1	1	1	2	1	0	0	0	1	0	0	1	1	0	0	1	1	4	1	0	0	2	1
TC0398	1	NYAMATONGO	NYAMATONGO	0	9	0	3	0	0	0	1	3	45.6868	120	0	118	0	130.5	0	25	0	0	0	1	0	0	1	1	0	0	1	0	0	0	1	1	2	1	0	0	0	1	1	2	1	0	0	2	1
TC0399	1	NYAMATONGO	NYAMATONGO	0	10	1	3	0	0	0	1	1	39.124	131	0	129	0	133.6	0	30	0	0	0	1	1	1	1	1	0	0	1	0	0	0	1	0	0	0	1	0	0	1	1	2	1	0	0	1	1
TC0400	1	NYAMATONGO	NYAMATONGO	0	10	1	4	0	0	0	1	3	43.898	119	0	117	0	124.2	0	26	0	0	0	0	1	0	1	0	.	.	.	.	.	.	1	1	4	1	0	0	0	1	0	0	1	1	0	1	1
TC0560	1	NYAMATONGO	NYAMATONGO	0	9	0	3	0	0	0	1	2	43.3766	119	0	117	0	135.6	1	26	0	0	1	1	1	0	1	0	.	.	.	.	.	.	1	1	2	1	0	0	0	1	0	0	0	0	0	1	1
TC0561	1	NYAMATONGO	NYAMATONGO	0	10	1	4	0	0	0	1	3	43.898	130	0	128	0	127.7	0	32	0	1	0	0	0	0	0	1	1	2	1	0	0	0	1	0	0	1	1	0	0	1	1	2	1	0	0	2	1
TC0562	1	NYAMATONGO	NYAMATONGO	0	9	0	3	0	0	0	1	4	47.997	111	1	109	1	117.6	0	19	0	1	0	0	1	0	1	1	0	0	1	0	0	0	1	1	2	1	0	0	0	1	1	2	1	0	0	2	1
TC0563	1	NYAMATONGO	NYAMATONGO	0	10	1	3	0	0	0	1	2	41.511	121	0	119	0	127.7	0	26	0	1	0	0	1	0	1	1	0	0	1	0	0	0	1	1	2	1	0	0	0	1	1	2	1	0	0	2	1
TC0564	1	NYAMATONGO	NYAMATONGO	1	9	0	3	0	0	0	1	4	47.997	127	0	125	0	130.5	0	28.5	0	1	0	1	0	1	1	1	0	0	1	0	0	0	1	1	2	1	0	0	0	1	1	0	1	1	0	2	1
TC0565	1	NYAMATONGO	NYAMATONGO	1	9	0	2	0	0	0	1	2	43.3766	.	.	.	.	131.5	0	30.5	0	0	0	0	1	0	1	1	1	2	1	0	0	0	1	1	2	1	0	0	0	1	1	2	1	0	0	3	1
TC0567	1	NYAMATONGO	NYAMATONGO	1	10	1	4	0	0	0	1	5	48.672	132	0	130	0	129.5	0	34	0	0	0	1	0	1	1	0	.	.	.	.	.	.	1	1	2	1	0	0	0	1	0	0	1	1	0	1	1
TC0568	1	NYAMATONGO	NYAMATONGO	1	9	0	3	0	0	0	1	7	54.9276	121	0	119	0	129	0	27.5	0	1	0	0	1	1	1	1	1	2	1	0	0	0	1	0	0	1	1	0	0	1	0	0	1	1	0	1	1
TC0570	1	NYAMATONGO	NYAMATONGO	1	10	1	3	0	0	0	1	2	41.511	133	0	131	0	132.05	0	34	0	1	0	0	1	1	1	1	0	0	1	0	0	0	1	1	4	1	0	0	0	1	1	4	1	0	0	2	1
TC0574	1	NYAMATONGO	NYAMATONGO	0	10	1	3	8	1	1	1	.	.	128	0	126	0	129.5	0	33.1	0	1	0	1	1	0	1	0	.	.	.	.	.	.	1	1	4	1	0	0	0	1	1	4	0	0	0	2	1
TC0575	1	NYAMATONGO	NYAMATONGO	0	10	1	4	0	0	0	1	5	48.672	124	0	122	0	140	1	30	0	1	0	0	0	0	1	1	0	0	1	0	0	0	1	1	2	1	0	0	0	1	0	0	1	0	0	1	1
TC0577	1	NYAMATONGO	NYAMATONGO	0	10	1	3	0	0	0	1	2	41.511	130	0	128	0	134.6	0	31	0	1	0	0	0	1	1	0	.	.	.	.	.	.	1	0	0	1	1	0	0	1	0	0	1	1	0	0	0
TC0578	1	NYAMATONGO	NYAMATONGO	0	9	0	3	0	0	0	1	2	43.3766	119	0	117	0	101	0	29	0	1	0	0	0	0	1	0	.	.	.	.	.	.	1	1	4	1	0	0	0	1	0	0	1	1	0	1	1
TC0579	1	NYAMATONGO	NYAMATONGO	1	10	1	4	0	0	0	1	5	48.672	118	0	116	0	124.4	0	28	0	1	0	0	1	0	1	1	0	0	1	1	0	0	1	0	0	1	1	0	0	1	0	0	1	1	0	0	0
TC0582	1	NYAMATONGO	NYAMATONGO	1	10	1	4	0	0	0	1	3	43.898	122	0	120	0	137.1	1	31	0	1	0	0	0	0	1	1	0	0	1	0	0	0	1	1	2	1	0	0	0	1	1	2	1	0	0	2	1
TC0584	1	NYAMATONGO	NYAMATONGO	0	10	1	4	0	0	0	1	5	48.672	119	0	117	0	135.8	1	31	0	1	0	0	1	1	1	1	0	0	0	1	0	0	1	1	2	1	0	0	0	1	1	2	1	0	0	2	1
TC0585	1	NYAMATONGO	NYAMATONGO	0	10	1	.	0	0	0	1	6	51.059	118	0	116	0	133.3	0	29.95	0	1	0	0	1	0	1	1	1	2	1	0	0	0	1	1	2	1	0	0	0	1	0	0	1	1	0	2	1
TC0588	1	CHAMABANDA	CHAMABANDA	1	10	1	4	0	0	0	6	6	51.059	122	0	120	0	137.2	1	31.1	0	1	0	1	0	1	1	1	0	0	1	0	0	0	1	1	2	1	0	0	0	1	1	2	1	0	0	2	1
TC0589	1	CHAMABANDA	CHAMABANDA	0	10	1	3	16	1	1	6	4	46.285	119	0	117	0	127	0	28.5	0	1	3	1	0	0	1	0	.	.	.	.	.	.	1	0	0	0	1	0	0	1	1	2	1	0	0	1	1
TC0590	1	CHAMABANDA	CHAMABANDA	0	9	0	3	28	1	1	6	3	45.6868	120	0	118	0	124.4	0	28.5	0	1	0	0	1	0	0	1	1	2	1	0	0	0	1	1	2	1	0	0	0	1	1	2	1	0	0	3	1
TC0591	1	CHAMABANDA	CHAMABANDA	1	10	1	4	0	0	0	6	5	48.672	130	0	128	0	147.3	1	33	0	1	0	0	1	0	1	1	1	2	1	0	0	0	1	1	2	1	0	0	0	1	1	2	1	0	0	3	1
TC0592	1	CHAMABANDA	CHAMABANDA	1	10	1	4	16	1	1	6	6	51.059	131	0	129	0	139.7	1	32	0	1	3	1	1	1	1	1	1	2	1	0	0	0	1	1	2	1	0	0	0	1	0	0	1	1	0	2	1
TC0594	1	CHAMABANDA	CHAMABANDA	1	10	1	4	12	1	1	6	5	48.672	139	0	137	0	142.2	1	40	0	0	0	1	1	1	1	1	0	0	1	0	0	0	1	0	0	1	1	0	0	1	0	0	1	1	0	0	0
TC0595	1	CHAMABANDA	CHAMABANDA	1	10	1	4	0	0	0	6	5	48.672	132	0	130	0	144.7	1	35	0	0	0	0	1	1	1	0	.	.	.	.	.	.	1	1	2	1	0	0	0	1	1	2	1	0	0	2	1
TC0596	1	CHAMABANDA	CHAMABANDA	0	10	1	2	0	0	0	6	5	48.672	118	0	116	0	132	0	27	0	1	1	0	1	1	1	1	0	0	1	0	0	0	1	1	4	1	0	0	0	1	1	2	1	0	0	2	1
TC0597	1	CHAMABANDA	CHAMABANDA	0	10	1	4	652	1	3	6	5	48.672	117	0	115	0	134.6	0	32	0	0	0	0	1	1	1	0	.	.	.	.	.	.	1	0	0	1	0	0	0	1	1	2	1	0	0	1	1
TC0598	1	CHAMABANDA	CHAMABANDA	0	10	1	4	20	1	1	6	3	43.898	112	1	110	1	123.9	0	27	0	1	0	0	1	1	1	0	.	.	.	.	.	.	1	0	2	0	0	0	0	1	1	2	1	0	0	1	1
TC0599	1	CHAMABANDA	CHAMABANDA	0	10	1	4	172	1	2	6	6	51.059	127	0	125	0	143.7	1	34.4	0	1	0	1	1	0	1	1	0	0	1	0	0	0	1	0	0	0	1	0	0	1	1	2	1	0	0	1	1
TC0601	1	CHAMABANDA	CHAMABANDA	0	10	1	4	640	1	3	6	3	43.898	122	0	120	0	144.7	1	31	0	1	0	1	1	1	1	1	0	0	1	0	0	0	1	1	2	1	0	0	0	1	1	2	1	0	0	2	1
TC0602	1	CHAMABANDA	CHAMABANDA	0	9	0	4	16	1	1	6	4	47.997	118	0	116	0	129.5	0	29	0	0	0	1	1	0	1	1	0	0	1	0	0	0	1	1	2	1	0	0	0	1	1	2	1	0	0	2	1
TC0604	1	CHAMABANDA	CHAMABANDA	0	10	1	3	16	1	1	6	2	41.511	122	0	120	0	134.6	0	30	0	0	0	1	1	1	1	1	0	0	1	0	0	0	1	1	2	1	0	0	0	0	.	.	.	.	.	1	1
TC0605	1	CHAMABANDA	CHAMABANDA	0	10	1	3	24	1	1	6	5	48.672	111	1	109	1	134.6	0	29.1	0	0	0	1	1	0	1	1	1	2	1	0	0	0	1	1	2	1	0	0	0	1	1	2	1	0	0	3	1
TC0606	1	CHAMABANDA	CHAMABANDA	0	10	1	4	0	0	0	6	3	43.898	132	0	130	0	142.2	1	42	0	0	0	0	1	0	1	1	0	0	1	0	0	0	1	1	2	1	0	0	0	1	1	4	1	0	0	2	1
TC0607	1	CHAMABANDA	CHAMABANDA	0	10	1	4	16	1	1	6	4	46.285	121	0	119	0	139.7	1	30.1	0	0	0	1	1	0	1	1	0	0	1	0	0	0	1	1	2	1	0	0	0	1	1	2	1	0	0	2	1
TC0608	1	CHAMABANDA	CHAMABANDA	0	9	0	2	0	0	0	6	3	45.6868	117	0	115	0	124.4	0	29	0	0	0	1	0	0	1	1	1	2	1	0	0	0	1	0	0	1	1	0	0	1	1	4	1	0	0	2	1
TC0609	1	CHAMABANDA	CHAMABANDA	0	9	0	3	24	1	1	6	3	45.6868	118	0	116	0	134.6	0	29.1	0	0	0	1	1	1	1	1	0	0	1	0	0	0	1	0	0	1	1	0	0	1	0	0	1	1	0	0	0
TC0610	1	CHAMABANDA	CHAMABANDA	0	10	1	4	8	1	1	6	3	43.898	117	0	115	0	129.8	0	31.1	0	0	0	0	1	0	1	1	0	0	1	0	0	0	1	1	2	1	0	0	0	1	1	2	1	0	0	2	1
TC0612	1	CHAMABANDA	CHAMABANDA	1	9	0	3	172	1	2	6	7	54.9276	114	1	112	1	132	0	29.1	0	0	0	1	1	1	1	1	0	0	1	0	0	0	1	1	2	1	0	0	0	1	1	2	1	0	0	2	1
TC0613	1	CHAMABANDA	CHAMABANDA	1	10	1	3	0	0	0	6	6	51.059	115	0	113	1	134.6	0	29	0	0	0	1	1	1	1	1	1	2	1	0	0	0	1	1	4	1	0	0	0	1	1	2	1	0	0	3	1
TC0614	1	CHAMABANDA	CHAMABANDA	1	9	0	2	140	1	2	6	3	45.6868	114	1	112	1	127	0	27	0	0	0	1	0	0	1	1	0	0	1	1	0	0	1	1	4	1	0	0	0	1	0	0	1	0	0	1	1
TC0615	1	CHAMABANDA	CHAMABANDA	1	10	1	4	120	1	2	6	4	46.285	131	0	129	0	142.2	1	35	0	0	0	1	1	1	1	1	0	0	1	0	0	0	1	0	0	1	1	0	0	1	0	0	1	0	0	0	0
TC0616	1	CHAMABANDA	CHAMABANDA	1	10	1	4	12	1	1	6	3	43.898	116	0	114	1	137.2	1	29	0	1	0	1	1	1	1	1	0	0	1	1	0	0	1	1	2	1	0	0	0	1	1	2	1	0	0	2	1
TC0617	1	CHAMABANDA	CHAMABANDA	1	10	1	3	0	0	0	6	3	43.898	114	1	112	1	129.5	0	28	0	1	0	1	1	1	1	1	0	0	1	1	0	0	1	0	0	0	1	0	0	1	1	2	1	0	0	1	1
TC0618	1	CHAMABANDA	CHAMABANDA	1	10	1	3	8	1	1	6	6	51.059	129	0	127	0	134.6	0	30.1	0	0	0	0	1	1	1	1	0	0	1	0	0	0	1	1	2	1	0	0	0	1	1	2	1	0	0	2	1
TC0619	1	CHAMABANDA	CHAMABANDA	0	9	0	2	32	1	1	6	4	47.997	112	1	110	1	124.4	0	25	0	1	0	1	1	0	1	1	0	0	1	0	0	0	1	0	0	1	0	0	0	1	0	0	1	0	0	0	0
TC0620	1	CHAMABANDA	CHAMABANDA	0	10	1	2	12	1	1	6	6	51.059	129	0	127	0	134.6	0	34	0	1	0	1	1	1	1	1	0	0	1	0	0	0	1	1	2	1	0	0	0	1	1	2	1	0	0	2	1
TC0621	1	CHAMABANDA	CHAMABANDA	1	9	0	3	24	1	1	6	3	45.6868	119	0	117	0	129.5	0	30.4	0	1	0	1	1	0	1	1	0	0	1	0	0	0	1	1	2	1	0	0	0	1	1	2	1	0	0	2	1
TC0622	1	CHAMABANDA	CHAMABANDA	1	10	1	2	0	0	0	6	4	46.285	127	0	125	0	134.6	0	30	0	1	0	0	1	0	1	1	1	2	1	0	0	0	1	1	2	1	0	0	0	1	0	0	1	0	0	2	1
TC0623	1	CHAMABANDA	CHAMABANDA	1	9	0	2	0	0	0	6	2	43.3766	128	0	126	0	129.5	0	29	0	0	0	1	0	1	0	1	1	2	1	0	0	0	1	1	2	1	0	0	0	1	0	0	1	1	0	2	1
TC0624	1	CHAMABANDA	CHAMABANDA	0	9	0	4	20	1	1	6	1	41.0664	126	0	124	0	130.8	0	29	0	0	0	0	0	1	1	0	.	.	.	.	.	.	1	1	2	1	0	0	0	1	1	2	1	0	0	2	1
TC0625	1	CHAMABANDA	CHAMABANDA	0	10	1	4	0	0	0	6	.	.	131	0	129	0	139.7	1	39	0	1	0	1	1	1	1	1	0	0	1	0	0	0	1	1	2	1	0	0	0	1	1	2	1	0	0	2	1
TC0626	1	CHAMABANDA	CHAMABANDA	0	10	1	.	8	1	1	1	3	43.898	128	0	126	0	137.2	1	30	0	1	0	1	1	1	1	1	0	0	1	0	0	0	1	1	2	1	0	0	0	1	1	2	1	0	0	2	1
TC0627	1	CHAMABANDA	CHAMABANDA	0	10	1	.	0	0	0	1	5	48.672	125	0	123	0	135.8	1	28	0	1	0	1	1	1	1	0	.	.	.	.	.	.	1	1	2	1	0	0	0	1	0	0	1	1	0	1	1
TC0628	1	CHAMABANDA	CHAMABANDA	0	10	1	.	20	1	1	1	.	.	132	0	130	0	143.5	1	36	0	1	0	0	1	1	1	1	0	0	1	0	0	0	1	1	2	1	0	0	0	1	1	2	1	0	0	2	1
TC0629	1	CHAMABANDA	CHAMABANDA	0	10	1	.	0	0	0	1	4	46.285	131	0	129	0	139.7	1	32	0	1	0	1	1	1	1	1	0	0	0	1	0	0	1	1	2	1	0	0	0	1	1	4	1	0	0	2	1
TC0630	1	CHAMABANDA	CHAMABANDA	0	10	1	.	0	0	0	1	3	43.898	131	0	129	0	137.2	1	33	0	1	0	0	1	1	1	0	.	.	.	.	.	.	1	1	2	1	0	0	0	1	1	2	1	0	0	2	1
TC0631	1	CHAMABANDA	CHAMABANDA	0	10	1	.	28	1	1	1	4	46.285	124	0	122	0	132	0	29	0	0	3	1	1	1	1	1	0	0	1	0	0	0	1	1	2	1	0	0	0	1	1	2	1	0	0	2	1
TC0632	1	CHAMABANDA	CHAMABANDA	1	10	1	.	12	1	1	1	3	43.898	129	0	127	0	129.5	0	31	0	0	1	0	0	1	1	1	1	2	1	0	0	0	1	1	2	1	0	0	0	1	0	0	1	1	0	2	1
TC0635	1	CHAMABANDA	CHAMABANDA	0	10	1	.	0	0	0	1	3	43.898	131	0	129	0	134.6	0	32	0	0	0	1	1	1	1	0	.	.	.	.	.	.	1	0	0	1	0	0	0	1	0	0	1	1	0	0	0
TC0636	1	CHAMABANDA	CHAMABANDA	0	10	1	.	20	1	1	1	2	41.511	139	0	137	0	149.8	1	42	0	0	0	1	1	0	1	0	.	.	.	.	.	.	1	1	2	1	0	0	0	1	0	0	1	1	0	1	1
TC0637	1	CHAMABANDA	CHAMABANDA	0	10	1	.	0	0	0	1	2	41.511	118	0	116	0	132.1	0	26	0	1	0	1	0	1	1	0	.	.	.	.	.	.	1	1	2	1	0	0	0	1	1	2	1	0	0	2	1
TC0638	1	CHAMABANDA	CHAMABANDA	0	9	0	3	0	0	0	6	3	45.6868	116	0	114	1	121.9	0	25	0	0	0	0	1	1	1	0	.	.	.	.	.	.	1	1	2	1	0	0	0	1	1	2	1	0	0	2	1
TC0639	1	CHAMABANDA	CHAMABANDA	0	9	0	2	8	1	1	6	3	45.6868	119	0	117	0	127	0	27	0	0	0	0	1	1	1	0	.	.	.	.	.	.	1	1	2	1	0	0	0	1	1	2	1	0	0	2	1
TC0640	1	CHAMABANDA	CHAMABANDA	0	9	0	2	20	1	1	6	4	47.997	121	0	119	0	134.6	0	29	0	1	0	1	1	0	1	1	0	0	1	0	0	0	1	1	2	1	0	0	0	1	1	2	1	0	0	2	1
TC0641	1	CHAMABANDA	CHAMABANDA	0	9	0	2	4	1	1	6	2	43.3766	127	0	125	0	132	0	30	0	0	0	1	1	0	1	1	0	0	1	0	0	0	1	1	2	1	0	0	0	1	1	2	1	0	0	2	1
TC0642	1	CHAMABANDA	CHAMABANDA	0	10	1	4	8	1	1	6	3	43.898	122	0	120	0	132	0	29	0	0	0	1	1	1	1	1	0	0	1	0	0	0	1	0	0	1	1	0	0	1	1	2	1	0	0	1	1
TC0644	1	CHAMABANDA	CHAMABANDA	0	9	0	2	4	1	1	6	1	41.0664	132	0	130	0	137.2	1	35	0	1	0	1	1	1	1	0	.	.	.	.	.	.	1	1	2	1	0	0	0	1	1	2	1	0	0	2	1
TC0647	1	CHAMABANDA	CHAMABANDA	1	10	1	4	4	1	1	6	5	48.672	134	0	132	0	137.15	1	35	0	1	0	0	1	1	1	1	0	0	1	0	0	0	1	1	2	1	0	0	0	1	1	2	1	0	0	2	1
TC0649	1	CHAMABANDA	CHAMABANDA	0	9	0	3	0	0	0	6	.	.	122	0	120	0	137.2	1	29	0	0	0	0	1	1	1	1	0	0	1	0	0	0	1	0	0	1	1	0	0	1	0	0	1	1	0	0	0
TC0652	1	CHAMABANDA	CHAMABANDA	1	10	1	4	0	0	0	6	2	41.511	122	0	120	0	129.5	0	26	0	1	0	0	0	1	1	1	1	2	0	0	0	0	1	1	2	1	0	0	0	1	0	0	1	1	0	2	1
TC0658	1	KASOMEKO	KASOMEKO	0	9	0	4	36	1	1	1	6	52.6174	120	0	118	0	149.35	1	35.9	0	0	0	1	1	0	1	1	0	0	1	0	0	0	1	1	2	1	0	0	0	1	1	4	1	0	0	2	1
TC0659	1	KASOMEKO	KASOMEKO	0	10	1	3	52	1	1	1	5	48.672	129	0	127	0	136.3	1	29.65	0	0	0	1	0	1	1	1	0	0	1	0	0	0	1	0	0	1	1	0	0	1	0	0	1	1	0	0	0
TC0660	1	KASOMEKO	KASOMEKO	0	10	1	4	0	0	0	1	4	46.285	119	0	117	0	136.8	1	32	0	1	0	1	1	1	1	1	1	4	1	0	0	0	1	1	2	1	0	0	0	1	1	2	1	0	0	3	1
TC0661	1	KASOMEKO	KASOMEKO	0	10	1	4	0	0	0	1	2	41.511	126	0	124	0	143.5	1	39.3	0	0	0	1	1	1	1	0	.	.	.	.	.	.	1	1	2	1	0	0	0	1	0	0	1	1	0	1	1
TC0662	1	KASOMEKO	KASOMEKO	0	10	1	4	0	0	0	1	5	48.672	124	0	122	0	133.6	0	28.6	0	0	0	1	0	0	1	0	.	.	.	.	.	.	1	0	0	1	1	0	0	1	1	2	1	0	0	1	1
TC0666	1	KASOMEKO	KASOMEKO	1	9	0	4	0	0	0	1	7	54.9276	137	0	135	0	143	1	27.6	1	0	0	0	1	0	1	1	0	0	1	0	0	0	1	1	4	1	0	0	0	1	1	4	1	0	0	2	1
TC0667	1	KASOMEKO	KASOMEKO	1	9	0	4	0	0	0	1	7	54.9276	92	1	90	1	130.7	0	29.85	0	0	0	1	1	1	1	1	0	0	1	0	0	0	1	1	2	1	0	0	0	1	0	0	1	1	0	1	1
TC0668	1	KASOMEKO	KASOMEKO	1	10	1	3	0	0	0	1	4	46.285	121	0	119	0	143.2	1	40.9	0	0	0	0	0	1	1	1	1	2	1	0	0	0	1	1	2	1	0	0	0	1	1	2	1	0	0	3	1
TC0670	1	KASOMEKO	KASOMEKO	1	10	1	4	4	1	1	1	5	48.672	85	1	83	1	140	1	33.3	0	1	0	1	1	0	1	1	0	0	1	0	0	0	1	1	2	1	0	0	0	1	0	0	1	1	0	1	1
TC0671	1	KASOMEKO	KASOMEKO	1	9	0	4	16	1	1	1	7	54.9276	91	1	89	1	131	0	27.4	0	0	0	0	1	0	1	1	1	4	1	0	0	0	1	1	4	1	0	0	0	1	1	4	1	0	0	3	1
TC0672	1	KASOMEKO	KASOMEKO	1	9	0	4	56	1	1	1	9	59.548	127	0	125	0	143.45	1	31.9	0	0	0	0	1	0	1	1	0	0	1	0	0	0	1	1	2	1	0	0	0	1	0	0	1	1	0	1	1
TC0673	1	KASOMEKO	KASOMEKO	0	10	1	3	0	0	0	1	5	48.672	118	0	116	0	144	1	38.6	0	0	0	1	0	1	1	1	1	2	1	0	0	0	1	1	2	1	0	0	0	1	1	2	1	0	0	3	1
TC0674	1	KASOMEKO	KASOMEKO	0	10	1	4	0	0	0	1	5	48.672	107	1	105	1	134.9	0	30.7	0	0	0	1	1	1	1	1	0	0	1	0	0	0	1	1	2	1	0	0	0	1	1	2	1	0	0	2	1
TC0675	1	KASOMEKO	KASOMEKO	0	10	1	3	0	0	0	1	4	46.285	125	0	123	0	136.2	1	31.5	0	0	0	0	1	0	1	1	0	0	1	0	0	0	1	1	2	1	0	0	0	1	0	0	1	1	0	1	1
TC0676	1	KASOMEKO	KASOMEKO	0	10	1	4	0	0	0	1	8	55.833	131	0	129	0	140.25	1	32.9	0	0	0	1	1	1	1	0	.	.	.	.	.	.	1	0	0	1	1	0	0	1	0	0	1	1	0	0	0
TC0677	1	KASOMEKO	KASOMEKO	0	10	1	4	0	0	0	1	5	48.672	125	0	123	0	156.2	1	47.8	0	0	0	1	1	0	1	1	0	0	1	0	0	0	0	.	.	.	.	.	.	1	1	2	1	0	0	1	1
TC0678	1	KASOMEKO	KASOMEKO	0	9	0	4	0	0	0	1	5	50.3072	123	0	121	0	129.4	0	27.5	0	0	0	1	1	1	1	1	0	0	1	0	0	0	1	0	0	1	1	0	0	1	0	0	1	1	0	0	0
TC0679	1	KASOMEKO	KASOMEKO	0	10	1	4	4	1	1	1	5	48.672	113	1	111	1	143.7	1	39.1	0	1	0	1	0	1	1	1	0	0	1	0	0	0	1	1	1	1	0	0	0	1	1	2	1	0	0	2	1
TC0680	1	KASOMEKO	KASOMEKO	0	10	1	4	4	1	1	1	5	48.672	118	0	116	0	147.8	1	35	0	1	0	0	1	1	1	1	0	0	1	0	0	0	1	1	2	1	0	0	0	1	1	2	1	0	0	2	1
TC0681	1	KASOMEKO	KASOMEKO	0	10	1	4	0	0	0	1	6	51.059	114	1	112	1	141.4	1	28.6	0	1	1	0	0	1	1	1	0	0	1	0	0	0	1	0	0	0	1	0	0	1	0	0	1	1	0	0	0
TC0682	1	KASOMEKO	KASOMEKO	0	9	0	4	0	0	0	1	3	45.6868	110	1	108	1	141	1	38.2	0	1	0	1	1	1	1	0	.	.	.	.	.	.	1	1	2	1	0	0	0	1	0	0	1	1	1	1	1
TC0683	1	KASOMEKO	KASOMEKO	0	9	0	4	720	1	3	1	3	45.6868	121	0	119	0	136	1	28.6	0	1	0	0	0	1	1	1	1	2	1	0	0	0	1	1	2	1	0	0	0	1	1	4	1	0	0	3	1
TC0684	1	KASOMEKO	KASOMEKO	0	10	1	4	116	1	2	1	7	53.446	145	0	143	0	148.5	1	41.1	0	0	0	1	1	1	1	1	0	0	1	0	1	0	1	1	2	1	0	1	0	1	0	0	1	1	1	1	1
TC0685	1	KASOMEKO	KASOMEKO	0	9	0	4	0	0	0	1	7	54.9276	112	1	110	1	134	0	29.8	0	1	0	0	1	0	1	1	1	2	1	0	0	0	1	1	2	1	0	0	0	1	0	0	1	0	0	2	1
TC0686	1	KASOMEKO	KASOMEKO	1	9	0	3	0	0	0	1	7	54.9276	147	0	145	0	134	0	26.3	0	0	0	0	1	1	1	1	0	0	1	0	0	0	1	1	2	1	0	0	0	1	1	4	1	0	0	2	1
TC0687	1	KASOMEKO	KASOMEKO	0	9	0	4	0	0	0	1	4	47.997	124	0	122	0	129.5	0	27.5	0	0	0	1	1	0	1	1	1	2	1	0	0	0	1	1	2	1	0	0	0	1	1	2	1	0	0	3	1
TC0688	1	KASOMEKO	KASOMEKO	0	10	1	4	4	1	1	1	5	48.672	122	0	120	0	137.35	1	30	0	0	0	0	1	0	1	0	.	.	.	.	.	.	1	1	2	1	0	0	0	1	1	2	1	0	0	2	1
TC0689	1	KASOMEKO	KASOMEKO	1	10	1	3	0	0	0	1	5	48.672	92	1	90	1	139	1	30	0	1	0	0	0	1	1	1	1	2	1	0	0	0	1	0	0	1	1	0	0	1	1	2	1	0	0	2	1
TC0690	1	KASOMEKO	KASOMEKO	1	9	0	3	0	0	0	1	9	59.548	120	0	118	0	123.3	0	25.5	0	0	0	0	1	0	1	1	1	2	1	0	0	0	1	0	0	1	1	0	0	1	1	2	1	0	0	2	1
TC0691	1	KASOMEKO	KASOMEKO	1	10	1	4	0	0	0	1	6	51.059	115	0	113	1	137	1	30	0	0	0	1	1	0	1	1	1	2	1	0	0	0	1	1	2	1	0	0	0	1	1	2	1	0	0	3	1
TC0692	1	KASOMEKO	KASOMEKO	1	10	1	4	0	0	0	1	7	53.446	104	1	102	1	147	1	37.7	0	1	0	0	1	0	1	1	1	2	1	0	0	0	1	1	2	1	0	0	0	1	1	2	1	0	0	3	1
TC0693	1	KASOMEKO	KASOMEKO	1	9	0	3	0	0	0	1	4	47.997	125	0	123	0	124.4	0	27	0	1	1	1	1	1	1	0	.	.	.	.	.	.	1	0	0	1	1	0	0	1	0	0	1	0	0	0	0
TC0694	1	KASOMEKO	KASOMEKO	1	10	1	4	0	0	0	1	7	53.446	129	0	127	0	147.75	1	40.3	0	0	0	1	1	0	1	1	0	0	1	0	0	0	1	1	2	1	0	0	0	1	0	0	1	1	0	1	1
TC0695	1	KASOMEKO	KASOMEKO	0	10	1	4	12	1	1	1	5	48.672	130	0	128	0	141.8	1	35.8	0	1	0	1	1	1	1	1	0	0	1	0	0	0	1	1	1	1	0	0	0	1	1	4	1	0	0	2	1
TC0696	1	KASOMEKO	KASOMEKO	0	10	1	4	12	1	1	1	6	51.059	119	0	117	0	136.8	1	32	0	0	0	1	1	1	1	1	0	0	1	0	1	0	1	1	4	1	0	0	0	1	0	0	1	1	0	1	1
TC0697	1	KASOMEKO	KASOMEKO	0	10	1	4	0	0	0	1	7	53.446	111	1	109	1	156.6	1	42	0	0	0	0	1	0	1	0	.	.	.	.	.	.	1	1	4	1	0	0	0	1	0	0	1	1	0	1	1
TC0700	1	KASOMEKO	KASOMEKO	1	10	1	4	0	0	0	1	7	53.446	130	0	128	0	147.5	1	39.5	0	0	0	0	0	1	1	0	.	.	.	.	.	.	1	1	2	1	0	0	0	1	1	2	1	0	0	2	1
TC0701	1	KASOMEKO	KASOMEKO	1	10	1	4	68	1	1	1	5	48.672	108	1	106	1	136.2	1	32	0	0	0	1	0	1	1	0	.	.	.	.	.	.	1	0	0	1	1	0	0	1	0	0	1	0	0	0	0
TC0702	1	KASOMEKO	KASOMEKO	1	10	1	4	44	1	1	1	5	48.672	118	0	116	0	146.5	1	35.4	0	0	0	1	0	1	1	1	0	0	1	0	0	0	1	1	2	1	0	0	0	1	1	2	1	0	0	2	1
TC0703	1	KASOMEKO	KASOMEKO	1	10	1	4	0	0	0	1	5	48.672	105	1	103	1	147.3	1	40.1	0	1	0	0	0	0	1	0	.	.	.	.	.	.	0	.	.	.	.	.	.	1	0	0	1	1	0	0	0
TC0704	1	KASOMEKO	KASOMEKO	0	10	1	4	20	1	1	1	6	51.059	116	0	114	1	136.4	1	32.4	0	0	0	1	1	1	1	1	0	0	1	0	0	0	1	1	4	1	0	0	0	1	1	4	1	0	0	2	1
TC0705	1	KASOMEKO	KASOMEKO	1	10	1	4	44	1	1	1	6	51.059	92	1	90	1	140.55	1	36.6	0	1	0	1	1	0	1	0	.	.	.	.	.	.	1	1	2	1	0	1	0	1	0	0	1	1	1	1	1
TC0706	1	KASOMEKO	KASOMEKO	1	10	1	4	68	1	1	1	6	51.059	111	1	109	1	146	1	35	0	1	0	0	1	1	1	0	.	.	.	.	.	.	1	1	2	1	0	0	0	1	1	2	1	0	0	2	1
TC0707	1	KASOMEKO	KASOMEKO	1	10	1	4	32	1	1	1	8	55.833	70	1	68	1	143	1	32	0	1	0	1	0	1	1	1	1	2	1	0	0	0	1	0	0	1	1	0	0	1	1	2	1	0	0	2	1
TC0708	1	KASOMEKO	KASOMEKO	1	10	1	4	64	1	1	1	5	48.672	119	0	117	0	136.8	1	32.3	0	1	0	0	1	1	1	1	1	2	1	0	0	0	0	.	.	.	.	.	.	1	1	4	1	0	0	2	1
TC0710	1	KASOMEKO	KASOMEKO	0	10	1	4	180	1	2	1	8	55.833	146	0	144	0	139.5	1	32.65	0	1	0	1	0	0	1	1	0	0	1	0	0	0	1	1	2	1	0	0	0	1	1	2	1	0	1	2	1
TC0713	1	KASOMEKO	KASOMEKO	0	10	1	4	0	0	0	1	.	.	85	1	83	1	145	1	34.2	0	0	0	1	0	0	1	1	0	0	1	0	0	0	1	1	2	1	0	0	0	1	1	2	1	0	0	2	1
TC0714	1	KASOMEKO	KASOMEKO	0	9	0	3	0	0	0	1	5	50.3072	103	1	101	1	123	0	22.5	0	1	0	1	1	0	1	1	0	0	1	0	0	0	1	1	2	1	0	0	0	1	0	0	1	1	0	1	1
TC0715	1	KASOMEKO	KASOMEKO	0	9	0	4	0	0	0	1	5	50.3072	124	0	122	0	129.5	0	27.7	0	1	0	1	1	1	1	1	1	2	1	0	0	0	1	0	0	1	0	0	0	1	0	0	1	1	0	1	1
TC0716	1	KASOMEKO	KASOMEKO	0	10	1	4	0	0	0	1	4	46.285	112	1	110	1	138.6	1	29.9	0	0	0	1	0	1	1	1	0	0	1	0	0	0	1	1	2	1	0	0	0	1	1	2	1	0	0	2	1
TC0717	1	KASOMEKO	KASOMEKO	0	10	1	4	0	0	0	1	5	48.672	121	0	119	0	125	0	27.2	0	1	0	1	1	0	1	1	1	4	1	0	0	0	1	0	0	1	1	0	0	1	0	0	1	1	0	1	1
TC0718	1	KASOMEKO	KASOMEKO	1	10	1	4	80	1	1	1	5	48.672	103	1	101	1	133	0	27.6	0	1	0	0	1	0	1	1	1	2	1	0	0	0	1	0	0	1	1	0	0	1	1	2	1	0	0	2	1
TC0719	1	KASOMEKO	KASOMEKO	0	10	1	4	0	0	0	1	6	51.059	94	1	92	1	140.9	1	31.6	0	1	0	1	0	0	1	1	0	0	1	0	0	0	1	1	2	1	0	0	0	1	1	2	1	0	0	2	1
TC0721	1	KASOMEKO	KASOMEKO	0	10	1	4	0	0	0	1	3	43.898	126	0	124	0	134.55	0	40.1	0	0	0	1	1	1	1	1	0	0	1	0	0	0	1	1	2	1	0	0	0	1	1	2	1	0	0	2	1
TC0722	1	KASOMEKO	KASOMEKO	1	9	0	3	8	1	1	1	7	54.9276	84	1	82	1	131.5	0	25.8	0	0	0	0	1	0	1	0	.	.	.	.	.	.	1	1	2	1	0	0	0	1	1	2	1	0	0	2	1
TC0723	1	KASOMEKO	KASOMEKO	0	9	0	4	16	1	1	1	6	52.6174	113	1	111	1	134.6	0	29.5	0	0	0	0	1	0	1	1	0	0	1	0	0	0	1	1	2	1	0	0	0	1	0	0	1	1	0	1	1
TC0725	1	KASOMEKO	KASOMEKO	1	9	0	4	0	0	0	1	8	57.2378	84	1	82	1	131	0	25.8	0	0	0	0	0	0	1	1	1	4	1	0	0	0	1	0	0	1	1	0	0	1	1	2	1	0	0	2	1
TC0726	1	KASOMEKO	KASOMEKO	0	9	0	4	0	0	0	1	5	50.3072	110	1	108	1	130	0	25.55	0	0	0	0	1	1	1	1	0	0	1	0	0	0	1	1	2	1	0	0	0	1	0	0	1	1	0	1	1
TC0727	1	KASOMEKO	KASOMEKO	0	10	1	4	0	0	0	1	4	46.285	133	0	131	0	152.2	1	42.6	0	0	0	1	1	0	1	1	0	0	1	0	0	0	1	0	0	1	1	0	0	1	1	2	1	0	0	1	1
TC0729	1	KASOMEKO	KASOMEKO	1	10	1	3	4	1	1	1	10	60.607	96	1	94	1	130	0	24.7	0	0	0	0	1	1	1	0	.	.	.	.	.	.	1	1	2	1	0	0	0	1	0	0	1	0	0	1	1
TC0730	1	KASOMEKO	KASOMEKO	1	10	1	4	0	0	0	1	8	55.833	116	0	114	1	149	1	38	0	0	0	0	0	1	1	1	1	2	1	0	0	0	1	1	2	1	0	0	0	1	1	2	1	0	0	3	1
TC0731	1	KASOMEKO	KASOMEKO	1	10	1	4	292	1	2	1	10	60.607	124	0	122	0	152	1	45.1	0	1	0	1	1	1	1	1	0	0	0	1	0	0	1	1	2	1	0	0	0	1	0	0	1	1	0	1	1
TC0734	1	KASOMEKO	KASOMEKO	1	10	1	4	0	0	0	1	7	53.446	119	0	117	0	147.5	1	37.6	0	1	0	0	1	1	1	0	.	.	.	.	.	.	1	1	2	1	0	0	0	1	1	2	1	0	0	2	1
TC0735	1	KASOMEKO	KASOMEKO	1	10	1	4	0	0	0	1	7	53.446	118	0	116	0	141.5	1	32.5	0	0	0	1	0	1	1	1	0	0	1	0	0	0	1	0	0	1	0	0	0	1	0	0	1	1	0	0	0
TC0736	1	KASOMEKO	KASOMEKO	1	9	0	2	0	0	0	1	7	54.9276	125	0	123	0	137.7	1	29.9	0	1	0	0	1	0	1	1	0	0	1	0	0	0	1	1	2	1	0	0	0	1	1	2	1	0	0	2	1
TC0738	1	KATUNGURU	KATUNGURU	0	10	1	4	0	0	0	6	2	41.511	123	0	121	0	150.25	1	45.5	0	0	0	1	1	1	1	1	0	0	1	1	0	0	1	0	0	1	0	0	0	1	0	0	1	1	0	0	0
TC0739	1	KATUNGURU	KATUNGURU	1	10	1	4	0	0	0	6	7	53.446	90	1	88	1	146.3	1	43.8	0	0	0	1	1	0	1	0	.	.	.	.	.	.	1	1	2	1	0	0	0	1	0	0	1	1	0	1	1
TC0740	1	KATUNGURU	KATUNGURU	0	9	0	4	0	0	0	6	3	45.6868	72	1	70	1	145.05	1	33	0	0	0	1	0	1	1	1	0	0	1	0	0	0	1	1	2	1	1	0	0	1	0	0	1	1	0	1	1
TC0741	1	KATUNGURU	KATUNGURU	1	10	1	4	0	0	0	6	6	51.059	120	0	118	0	143	1	33.65	0	0	0	1	1	0	1	0	.	.	.	.	.	.	1	1	2	1	0	0	0	1	1	2	1	0	0	2	1
TC0742	1	KATUNGURU	KATUNGURU	0	9	0	4	0	0	0	6	2	43.3766	60	1	58	1	142	1	36.1	0	0	0	0	1	0	1	1	1	2	1	0	0	0	1	1	2	1	0	0	0	1	0	0	1	1	0	2	1
TC0743	1	KATUNGURU	KATUNGURU	1	10	1	4	0	0	0	6	7	53.446	112	1	110	1	139	1	33.2	0	1	0	0	1	1	1	1	0	0	0	1	0	0	1	1	2	1	0	0	0	1	1	4	1	0	0	2	1
TC0744	1	KATUNGURU	KATUNGURU	0	10	1	4	4	1	1	6	3	43.898	125	0	123	0	141.45	1	40.3	0	0	0	1	0	1	1	1	0	0	1	0	0	0	1	1	2	1	0	0	0	1	1	2	1	0	0	2	1
TC0745	1	KATUNGURU	KATUNGURU	1	10	1	4	0	0	0	6	8	55.833	70	1	68	1	148.7	1	36.7	0	1	0	1	1	1	1	1	0	0	0	1	0	0	1	1	2	1	0	0	0	1	0	0	1	1	0	1	1
TC0746	1	KATUNGURU	KATUNGURU	0	9	0	4	68	1	1	6	4	47.997	116	0	114	1	138.3	1	30.1	0	0	0	0	1	1	1	1	0	0	1	0	0	0	1	1	2	1	0	0	0	1	0	0	1	1	0	1	1
TC0748	1	KATUNGURU	KATUNGURU	0	9	0	4	0	0	0	6	4	47.997	105	1	103	1	129.5	0	24.3	0	0	0	1	0	1	1	0	.	.	.	.	.	.	1	1	2	1	0	0	0	1	0	0	1	1	0	1	1
TC0749	1	KATUNGURU	KATUNGURU	1	9	0	4	0	0	0	6	7	54.9276	124	0	122	0	131.45	0	29.9	0	1	0	1	1	0	1	1	0	0	1	0	0	0	1	1	2	1	0	0	0	1	0	0	1	1	0	1	1
TC0750	1	KATUNGURU	KATUNGURU	0	10	1	4	0	0	0	6	2	41.511	136	0	134	0	151.3	1	35.8	0	0	0	1	1	1	0	0	.	.	.	.	.	.	1	0	0	1	1	0	0	1	1	2	1	0	0	1	1
TC0751	1	KATUNGURU	KATUNGURU	0	10	1	4	16	1	1	6	3	43.898	124	0	122	0	151.2	1	41.1	0	0	0	1	1	1	1	1	0	0	1	0	0	0	1	1	2	1	0	0	0	1	1	2	1	0	0	2	1
TC0752	1	KATUNGURU	KATUNGURU	0	10	1	4	0	0	0	6	5	48.672	97	1	95	1	152.5	1	33.6	0	0	0	1	1	1	1	1	0	0	1	0	0	0	1	1	2	1	0	0	0	1	1	2	1	0	0	2	1
TC0754	1	KATUNGURU	KATUNGURU	0	9	0	4	40	1	1	6	2	43.3766	107	1	105	1	134.6	0	40.7	0	0	0	1	1	0	1	1	0	0	1	0	0	0	1	1	2	1	0	0	0	1	1	2	1	0	0	2	1
TC0755	1	KATUNGURU	KATUNGURU	1	10	1	4	12	1	1	6	5	48.672	136	0	134	0	152.3	1	43.6	0	0	0	0	1	1	1	1	0	0	1	1	0	0	1	1	2	1	0	0	0	1	1	2	1	0	0	2	1
TC0756	1	KATUNGURU	KATUNGURU	0	10	1	4	20	1	1	6	2	41.511	60	1	58	1	141.25	1	31.7	0	0	0	1	1	0	1	1	0	0	1	0	0	0	1	1	2	1	0	0	0	1	0	0	1	0	0	1	1
TC0758	1	KATUNGURU	KATUNGURU	0	9	0	3	0	0	0	6	3	45.6868	101	1	99	1	141.5	1	35.4	0	1	0	0	1	0	1	1	0	0	1	0	0	0	1	0	0	1	1	0	0	1	0	0	1	1	0	0	0
TC0760	1	KATUNGURU	KATUNGURU	0	9	0	3	56	1	1	6	6	52.6174	127	0	125	0	138	1	31.4	0	1	0	1	1	1	1	0	.	.	.	.	.	.	1	1	2	1	0	0	0	1	0	0	1	1	0	1	1
TC0761	1	KATUNGURU	KATUNGURU	1	9	0	4	0	0	0	6	4	47.997	124	0	122	0	131.5	0	25.3	0	0	0	0	1	1	1	1	0	0	1	0	0	0	1	0	0	1	1	0	0	1	0	0	1	1	0	0	0
TC0762	1	KATUNGURU	KATUNGURU	0	9	0	4	40	1	1	6	2	43.3766	100	1	98	1	140.4	1	33	0	0	0	1	1	1	1	1	1	2	1	0	0	0	1	0	0	1	1	0	0	1	0	0	1	0	0	1	1
TC0763	1	KATUNGURU	KATUNGURU	1	10	1	4	20	1	1	6	8	55.833	135	0	133	0	150.8	1	34.8	0	0	0	0	1	0	1	1	1	2	1	0	0	0	1	0	0	1	1	0	0	1	0	0	1	1	0	1	1
TC0764	1	KATUNGURU	KATUNGURU	0	10	1	4	0	0	0	6	3	43.898	124	0	122	0	147.2	1	49.4	0	0	0	1	1	1	1	1	1	2	1	0	0	0	1	0	0	1	1	0	0	1	0	0	1	1	0	1	1
TC0766	1	KATUNGURU	KATUNGURU	0	9	0	4	0	0	0	6	6	52.6174	126	0	124	0	123.9	0	23.8	0	0	0	0	0	0	1	1	0	0	1	0	0	0	1	1	2	1	0	0	0	1	1	2	1	0	0	2	1
TC0768	1	KATUNGURU	KATUNGURU	0	10	1	4	16	1	1	6	4	46.285	137	0	135	0	143.5	1	45.1	0	1	0	1	0	0	1	1	1	2	1	0	0	0	1	1	2	1	0	0	0	1	1	2	1	0	0	3	1
TC0769	1	KATUNGURU	KATUNGURU	1	10	1	4	0	0	0	6	8	55.833	127	0	125	0	146.5	1	37.1	0	0	0	0	1	0	1	1	1	2	1	0	0	0	1	1	2	1	0	0	0	1	1	2	1	0	0	3	1
TC0771	1	KATUNGURU	KATUNGURU	1	9	0	4	0	0	0	6	5	50.3072	134	0	132	0	138.3	1	30.65	0	0	0	1	1	1	1	1	1	2	1	0	0	0	1	1	2	1	0	0	0	1	0	0	1	1	0	2	1
TC0772	1	KATUNGURU	KATUNGURU	0	10	1	4	12	1	1	6	5	48.672	127	0	125	0	141.4	1	37.4	0	1	0	1	0	1	1	1	0	0	1	0	0	0	1	0	0	1	1	0	0	1	1	2	1	0	0	1	1
TC0774	1	KATUNGURU	KATUNGURU	0	9	0	3	0	0	0	6	3	45.6868	125	0	123	0	145.8	1	43.9	0	0	0	1	0	0	1	0	.	.	.	.	.	.	1	0	0	1	1	0	0	1	1	2	1	0	0	1	1
TC0775	1	KATUNGURU	KATUNGURU	1	10	1	3	40	1	1	6	2	41.511	104	1	102	1	132.5	0	31	0	1	0	1	1	1	1	1	0	0	1	0	0	0	1	0	0	1	1	0	0	1	0	0	1	1	0	0	0
TC0780	1	KATUNGURU	KATUNGURU	1	10	1	4	0	0	0	6	5	48.672	149	0	147	0	133.5	0	27.3	0	0	0	0	1	1	1	1	0	0	0	1	0	0	1	0	0	1	1	0	0	1	1	2	1	0	0	1	1
TC0783	1	KATUNGURU	KATUNGURU	1	10	1	4	0	0	0	6	3	43.898	129	0	127	0	137.5	1	31.3	0	0	0	0	1	0	1	1	0	0	1	0	0	0	1	1	2	1	0	0	0	1	1	2	1	0	0	2	1
TC0787	1	KATUNGURU	KATUNGURU	0	9	0	2	0	0	0	6	4	47.997	124	0	122	0	129.3	0	27.7	0	0	1	0	0	0	1	1	0	0	1	0	0	0	1	0	0	1	1	0	0	1	0	0	1	1	0	0	0
TC0789	1	KATUNGURU	KATUNGURU	0	9	0	2	0	0	0	6	4	47.997	108	1	106	1	128.85	0	27.5	0	0	0	0	1	1	1	1	0	0	1	0	0	0	1	1	2	1	0	0	0	1	1	2	1	0	0	2	1
TC0792	1	KATUNGURU	KATUNGURU	0	9	0	2	0	0	0	6	3	45.6868	102	1	100	1	128.45	0	24.2	0	0	0	0	1	0	1	1	0	0	1	0	0	0	1	1	2	1	0	0	0	1	1	2	1	0	0	2	1
TC0794	1	KATUNGURU	KATUNGURU	0	9	0	2	0	0	0	6	1	41.0664	66	1	64	1	130	0	28.8	0	0	1	0	1	0	1	0	.	.	.	.	.	.	1	1	2	1	0	0	0	1	0	0	1	0	0	1	1
TC0795	1	KATUNGURU	KATUNGURU	0	9	0	2	0	0	0	6	2	43.3766	124	0	122	0	129.3	0	27.5	0	1	0	0	1	0	1	1	0	0	1	1	0	0	1	1	2	1	0	0	0	1	1	2	1	0	0	2	1
TC0798	1	KATUNGURU	KATUNGURU	0	9	0	2	0	0	0	6	2	43.3766	124	0	122	0	129.5	0	27.7	0	0	0	1	1	1	1	1	0	0	1	0	0	0	1	1	4	1	0	0	0	1	1	4	1	0	0	2	1
TC0801	1	KATUNGURU	KATUNGURU	0	9	0	3	0	0	0	6	4	47.997	100	1	98	1	131.65	0	30.4	0	0	0	1	1	0	1	1	0	0	1	1	0	0	1	0	0	1	1	0	0	1	1	2	1	0	0	1	1
TC0802	1	KATUNGURU	KATUNGURU	0	9	0	3	0	0	0	6	1	41.0664	117	0	115	0	136	1	33.4	0	1	0	0	1	1	1	1	1	2	1	0	0	0	1	1	2	1	0	0	0	1	1	2	1	0	0	3	1
TC0803	1	KATUNGURU	KATUNGURU	0	9	0	3	0	0	0	6	5	50.3072	124	0	122	0	129.4	0	27.7	0	0	0	0	1	1	1	1	0	0	1	0	0	0	1	1	2	1	0	0	0	1	1	2	1	0	0	2	1
TC0809	1	KATUNGURU	KATUNGURU	1	10	1	4	0	0	0	6	8	55.833	60	1	58	1	141	1	29.9	0	0	0	1	1	1	1	1	0	0	1	0	0	0	1	0	0	1	1	0	0	1	0	0	0	1	0	0	0
TC0810	1	KATUNGURU	KATUNGURU	1	9	0	3	0	0	0	6	4	47.997	113	1	111	1	135.3	1	23.9	1	0	0	1	0	1	1	1	0	0	1	0	0	0	1	1	2	1	0	0	0	1	1	2	1	0	0	2	1
TC0811	1	KATUNGURU	KATUNGURU	1	10	1	4	0	0	0	6	7	53.446	133	0	131	0	145.5	1	33.4	0	0	0	1	1	0	1	1	0	0	1	0	0	0	1	0	0	1	1	0	0	1	0	0	1	1	0	0	0
TC0812	1	KATUNGURU	KATUNGURU	0	10	1	4	28	1	1	6	3	43.898	128	0	126	0	146.7	1	34.2	0	0	0	1	1	0	1	1	0	0	1	0	0	0	1	0	0	1	1	0	0	1	0	0	1	1	0	0	0
TC0818	1	NYAMAZUGO	NYAMAZUGO	0	10	1	3	4	1	1	6	2	41.511	140	0	138	0	137.16	1	36	0	0	0	1	0	1	1	0	.	.	.	.	.	.	1	0	0	0	1	0	0	1	1	2	1	0	0	1	1
TC0819	1	NYAMAZUGO	NYAMAZUGO	0	9	0	4	0	0	0	6	3	45.6868	60	1	58	1	129.5	0	29	0	1	0	1	1	0	1	0	.	.	.	.	.	.	1	0	0	1	1	0	0	1	0	0	1	1	0	0	0
TC0820	1	NYAMAZUGO	NYAMAZUGO	0	9	0	4	4	1	1	6	2	43.3766	70	1	68	1	132	0	30	0	1	0	0	1	0	1	1	1	2	1	0	0	0	1	0	0	1	1	0	0	1	1	2	1	0	0	2	1
TC0823	1	NYAMAZUGO	NYAMAZUGO	0	9	0	3	0	0	0	6	4	47.997	90	1	88	1	132	0	29	0	1	0	0	1	1	1	1	1	2	1	0	0	0	1	1	2	1	0	0	0	1	1	2	1	0	0	3	1
TC0824	1	NYAMAZUGO	NYAMAZUGO	0	10	1	4	0	0	0	6	4	46.285	108	1	106	1	127	0	29	0	1	0	0	0	0	1	0	.	.	.	.	.	.	1	1	2	1	0	0	0	1	1	2	1	0	0	2	1
TC0825	1	NYAMAZUGO	NYAMAZUGO	0	9	0	4	0	0	0	6	6	52.6174	80	1	78	1	127	0	28	0	1	1	1	1	0	1	1	0	0	1	1	0	0	1	0	0	1	1	0	0	1	0	0	1	1	0	0	0
TC0826	1	NYAMAZUGO	NYAMAZUGO	0	10	1	3	0	0	0	6	6	51.059	120	0	118	0	132	0	34	0	1	0	1	1	0	1	0	.	.	.	.	.	.	1	1	4	1	0	0	0	1	0	0	1	1	0	1	1
TC0828	1	NYAMAZUGO	NYAMAZUGO	0	10	1	4	0	0	0	6	2	41.511	80	1	78	1	139.7	1	34	0	1	0	0	1	0	1	0	.	.	.	.	.	.	1	0	0	1	1	0	0	1	0	0	1	1	0	0	0
TC0829	1	NYAMAZUGO	NYAMAZUGO	0	10	1	3	0	0	0	6	6	51.059	75	1	73	1	127	0	26	0	1	0	0	0	0	1	0	.	.	.	.	.	.	1	0	0	0	1	0	0	1	1	2	1	0	0	1	1
TC0830	1	NYAMAZUGO	NYAMAZUGO	0	10	1	3	0	0	0	6	3	43.898	83	1	81	1	119.4	0	26	0	0	0	1	1	0	1	1	1	4	1	0	0	0	1	1	2	1	0	0	0	1	0	0	1	1	0	2	1
TC0831	1	NYAMAZUGO	NYAMAZUGO	0	10	1	4	0	0	0	6	3	43.898	84	1	82	1	139.7	1	34	0	1	0	0	1	1	1	0	.	.	.	.	.	.	1	0	0	1	1	0	0	1	0	0	1	1	0	0	0
TC0833	1	NYAMAZUGO	NYAMAZUGO	0	10	1	4	0	0	0	6	.	.	100	1	98	1	124.4	0	25	0	0	0	1	1	0	1	1	0	0	1	0	0	0	1	1	2	1	0	0	0	1	1	2	1	0	0	2	1
TC0834	1	NYAMAZUGO	NYAMAZUGO	0	10	1	3	0	0	0	6	2	41.511	120	0	118	0	134.6	0	32	0	1	0	0	1	0	1	1	0	0	1	1	0	0	1	1	2	1	0	0	0	1	1	2	1	0	0	2	1
TC0835	1	NYAMAZUGO	NYAMAZUGO	0	10	1	3	0	0	0	6	3	43.898	110	1	108	1	119.4	0	27	0	0	0	0	1	0	1	0	.	.	.	.	.	.	1	1	2	1	0	0	0	1	0	0	1	1	0	1	1
TC0836	1	NYAMAZUGO	NYAMAZUGO	0	9	0	4	0	0	0	6	3	45.6868	110	1	108	1	127	0	28	0	0	0	1	1	1	1	1	1	2	1	0	0	0	1	1	4	1	0	0	0	1	1	2	1	0	0	3	1
TC0837	1	NYAMAZUGO	NYAMAZUGO	0	9	0	4	0	0	0	6	4	47.997	180	0	178	0	124.4	0	27	0	1	0	1	1	1	1	1	1	2	1	0	0	0	1	0	0	1	1	0	0	1	1	2	1	0	0	2	1
TC0838	1	NYAMAZUGO	NYAMAZUGO	1	10	1	3	0	0	0	6	5	48.672	150	0	148	0	137	1	34	0	0	0	1	1	1	1	1	0	0	1	1	0	0	1	0	0	1	1	0	0	1	1	4	1	0	0	1	1
TC0840	1	NYAMAZUGO	NYAMAZUGO	1	9	0	3	0	0	0	6	5	50.3072	118	0	116	0	124.4	0	28	0	0	0	1	1	1	1	0	.	.	.	.	.	.	1	1	2	1	0	0	0	1	0	0	1	1	0	1	1
TC0841	1	NYAMAZUGO	NYAMAZUGO	1	9	0	4	4	1	1	6	3	45.6868	90	1	88	1	121.9	0	28	0	1	0	0	0	1	1	0	.	.	.	.	.	.	1	1	2	1	0	0	0	1	1	2	1	0	0	2	1
TC0842	1	NYAMAZUGO	NYAMAZUGO	1	9	0	4	0	0	0	6	2	43.3766	108	1	106	1	129.5	0	28	0	0	0	1	1	0	1	1	0	0	0	1	0	0	1	1	2	1	1	0	0	1	1	2	1	0	0	2	1
TC0843	1	NYAMAZUGO	NYAMAZUGO	1	10	1	4	0	0	0	6	7	53.446	100	1	98	1	124.4	0	27	0	1	0	0	1	0	1	0	.	.	.	.	.	.	1	1	2	1	0	0	0	1	1	2	1	0	0	2	1
TC0844	1	NYAMAZUGO	NYAMAZUGO	1	9	0	4	0	0	0	6	4	47.997	156	0	154	0	124.5	0	27	0	1	0	0	1	0	1	1	0	0	0	1	0	0	1	1	2	1	0	0	0	1	1	2	1	0	0	2	1
TC0845	1	NYAMAZUGO	NYAMAZUGO	1	10	1	2	0	0	0	6	6	51.059	122	0	120	0	132	0	28	0	0	0	0	1	1	1	1	1	2	1	0	0	0	1	1	2	1	0	0	0	1	0	0	1	1	0	2	1
TC0846	1	NYAMAZUGO	NYAMAZUGO	1	10	1	4	0	0	0	6	4	46.285	140	0	138	0	137.1	1	32	0	0	0	0	1	1	1	0	.	.	.	.	.	.	1	1	0	1	0	0	0	1	0	0	1	1	0	1	1
TC0848	1	NYAMAZUGO	NYAMAZUGO	1	10	1	4	0	0	0	6	6	51.059	79	1	77	1	129.5	0	27	0	0	0	1	1	1	1	1	0	0	1	0	0	0	1	0	0	1	1	0	0	1	1	2	1	0	0	1	1
TC0849	1	NYAMAZUGO	NYAMAZUGO	1	9	0	4	0	0	0	6	7	54.9276	130	0	128	0	129.5	0	30	0	0	0	0	1	0	1	0	.	.	.	.	.	.	1	0	0	0	1	0	0	1	1	2	1	0	0	1	1
TC0850	1	NYAMAZUGO	NYAMAZUGO	1	9	0	3	8	1	1	6	3	45.6868	100	1	98	1	76.1	0	.	.	1	0	1	1	0	1	1	1	4	1	0	0	0	1	0	0	1	1	0	0	1	1	2	1	0	0	2	1
TC0852	1	NYAMAZUGO	NYAMAZUGO	1	10	1	3	0	0	0	6	7	53.446	115	0	113	1	129.5	0	28	0	1	0	0	1	1	1	0	.	.	.	.	.	.	1	1	2	1	0	0	0	1	1	2	1	0	0	2	1
TC0853	1	NYAMAZUGO	NYAMAZUGO	1	10	1	4	0	0	0	6	.	.	77	1	75	1	129.5	0	26	0	0	0	0	1	1	1	1	1	2	1	0	0	0	1	1	4	1	0	0	0	1	1	4	1	0	0	3	1
TC0854	1	NYAMAZUGO	NYAMAZUGO	1	10	1	3	0	0	0	6	6	51.059	131	0	129	0	134.6	0	32	0	0	0	0	1	0	1	1	0	0	1	0	0	0	1	1	2	1	0	0	0	1	1	2	1	0	0	2	1
TC0855	1	NYAMAZUGO	NYAMAZUGO	1	9	0	3	0	0	0	6	3	45.6868	95	1	93	1	127	0	31	0	1	0	0	1	0	1	1	1	2	1	0	0	0	1	1	2	1	0	0	0	1	1	2	1	0	0	3	1
TC0856	1	NYAMAZUGO	NYAMAZUGO	1	10	1	4	24	1	1	6	5	48.672	111	1	109	1	137.1	1	34	0	0	0	0	1	1	1	1	0	0	0	1	0	0	1	1	2	1	0	0	0	1	0	0	1	1	0	1	1
TC0857	1	NYAMAZUGO	NYAMAZUGO	1	10	1	3	32	1	1	6	4	46.285	70	1	68	1	137.1	1	32	0	1	0	1	0	1	1	1	1	2	1	0	0	0	1	0	0	1	1	0	0	1	0	0	1	1	0	1	1
TC0859	1	NYAMAZUGO	NYAMAZUGO	1	10	1	4	0	0	0	6	5	48.672	100	1	98	1	132	0	28	0	1	0	1	1	1	1	0	.	.	.	.	.	.	1	1	2	1	0	0	0	1	1	2	1	0	0	2	1
TC0860	1	NYAMAZUGO	NYAMAZUGO	1	10	1	4	0	0	0	6	5	48.672	142	0	140	0	129.5	0	30	0	1	0	0	1	1	1	1	1	2	1	0	0	0	1	0	0	1	1	0	0	1	1	0	1	1	0	2	1
TC0864	1	NYAMAZUGO	NYAMAZUGO	1	9	0	3	0	0	0	6	4	47.997	137	0	135	0	139.7	1	30	0	1	0	0	1	0	1	1	1	2	1	0	0	0	1	1	2	1	0	0	0	1	1	2	1	0	0	3	1
TC0865	1	NYAMAZUGO	NYAMAZUGO	1	10	1	4	0	0	0	6	2	41.511	148	0	146	0	134.6	0	29	0	1	0	0	1	0	1	1	1	1	1	0	0	0	1	1	1	1	0	0	0	1	1	2	1	0	0	3	1
TC0866	1	NYAMAZUGO	NYAMAZUGO	1	9	0	3	0	0	0	6	5	50.3072	128	0	126	0	132	0	26	0	1	0	0	0	0	1	1	0	0	1	0	0	0	1	1	2	1	0	0	0	1	0	0	1	0	0	1	1
TC0868	1	NYAMAZUGO	NYAMAZUGO	1	10	1	.	0	0	0	1	5	48.672	135	0	133	0	132	0	31	0	1	0	1	1	0	1	1	1	2	1	0	0	0	1	1	2	1	0	0	0	1	1	2	1	0	0	3	1
TC0869	1	NYAMAZUGO	NYAMAZUGO	0	10	1	.	0	0	0	1	.	.	132	0	130	0	129.5	0	26	0	0	0	1	1	1	1	1	0	0	1	0	0	0	1	1	2	1	0	0	0	1	1	0	1	1	0	2	1
TC0874	1	NYAMAZUGO	NYAMAZUGO	1	10	1	.	0	0	0	1	5	48.672	83	1	81	1	119.3	0	22	0	0	0	1	1	0	1	1	1	2	1	0	0	0	1	1	2	1	0	0	0	1	0	0	1	1	0	2	1
TC0875	1	NYAMAZUGO	NYAMAZUGO	0	10	1	.	0	0	0	1	2	41.511	123	0	121	0	129.5	0	27	0	0	0	0	1	0	1	1	1	2	1	0	0	0	1	1	4	1	0	0	0	1	1	1	1	0	0	3	1
TC0876	1	NYAMAZUGO	NYAMAZUGO	1	10	1	.	0	0	0	1	4	46.285	134	0	132	0	129.8	0	27	0	0	0	0	1	0	1	1	1	2	1	0	0	0	1	0	0	1	1	0	0	1	1	1	1	0	0	2	1
TC0883	1	NYAMAZUGO	NYAMAZUGO	1	10	1	.	0	0	0	1	.	.	70	1	68	1	122.4	0	25	0	1	0	1	1	0	1	0	.	.	.	.	.	.	1	1	2	1	0	0	0	1	0	0	0	1	0	1	1
TC0884	1	NYAMAZUGO	NYAMAZUGO	0	10	1	.	0	0	0	1	3	43.898	116	0	114	1	129.8	0	29.2	0	1	0	0	0	0	1	1	1	2	1	0	0	0	0	.	.	.	.	.	.	1	1	2	1	0	0	2	1
TC0886	1	NYAMAZUGO	NYAMAZUGO	0	10	1	.	72	1	1	1	4	46.285	112	1	110	1	139.7	1	29	0	0	1	0	0	0	1	1	1	4	1	0	0	0	1	1	2	1	0	0	0	1	1	2	1	0	0	3	1
[truncated: 14 more columns]
